# Supplementary material for: Development of a real-time fluorescence loop-mediated isothermal amplification assay for rapid and quantitative detection of Ustilago maydis
Source: PubMed Central journal article supplement (PMC5645423; doi:10.1038/s41598-017-13881-4), 2017-10-17
Supplement: 41598_2017_13881_MOESM1_ESM.pdf [file 41598_2017_13881_MOESM1_ESM.pdf]

**TITLE:**

Development of a real-time fluorescence loop-mediated isothermal amplification assay for rapid and quantitative detection of *Ustilago maydis*

**AUTHORS:**

Yanyong Cao<sup>1, +</sup>, Lifeng Wang<sup>1, +</sup>, Liping Duan<sup>2</sup>, Jingjing Li<sup>1</sup>, Juan Ma<sup>1</sup>, Shuna Xie<sup>3</sup>, Lei Shi<sup>2</sup> & Huiyong Li<sup>1</sup>

**AFFILIATION:**

<sup>1</sup> Institute of Cereal Crops, Henan Academy of Agricultural Sciences, Zhengzhou, 450002, China

<sup>2</sup> Institute of Food Safety and Nutrition, Jinan University, Guangzhou, 510632, China

<sup>3</sup> Institute of Plant Protection, Henan Academy of Agricultural Sciences, Zhengzhou, 450002, China

Correspondence and requests for materials should be addressed to Y.C. (email: [yanyongcao@126.com](mailto:yanyongcao@126.com)) or H.L. (email: [lihuiyong1977@126.com](mailto:lihuiyong1977@126.com))

+These authors contribute equally to this work.

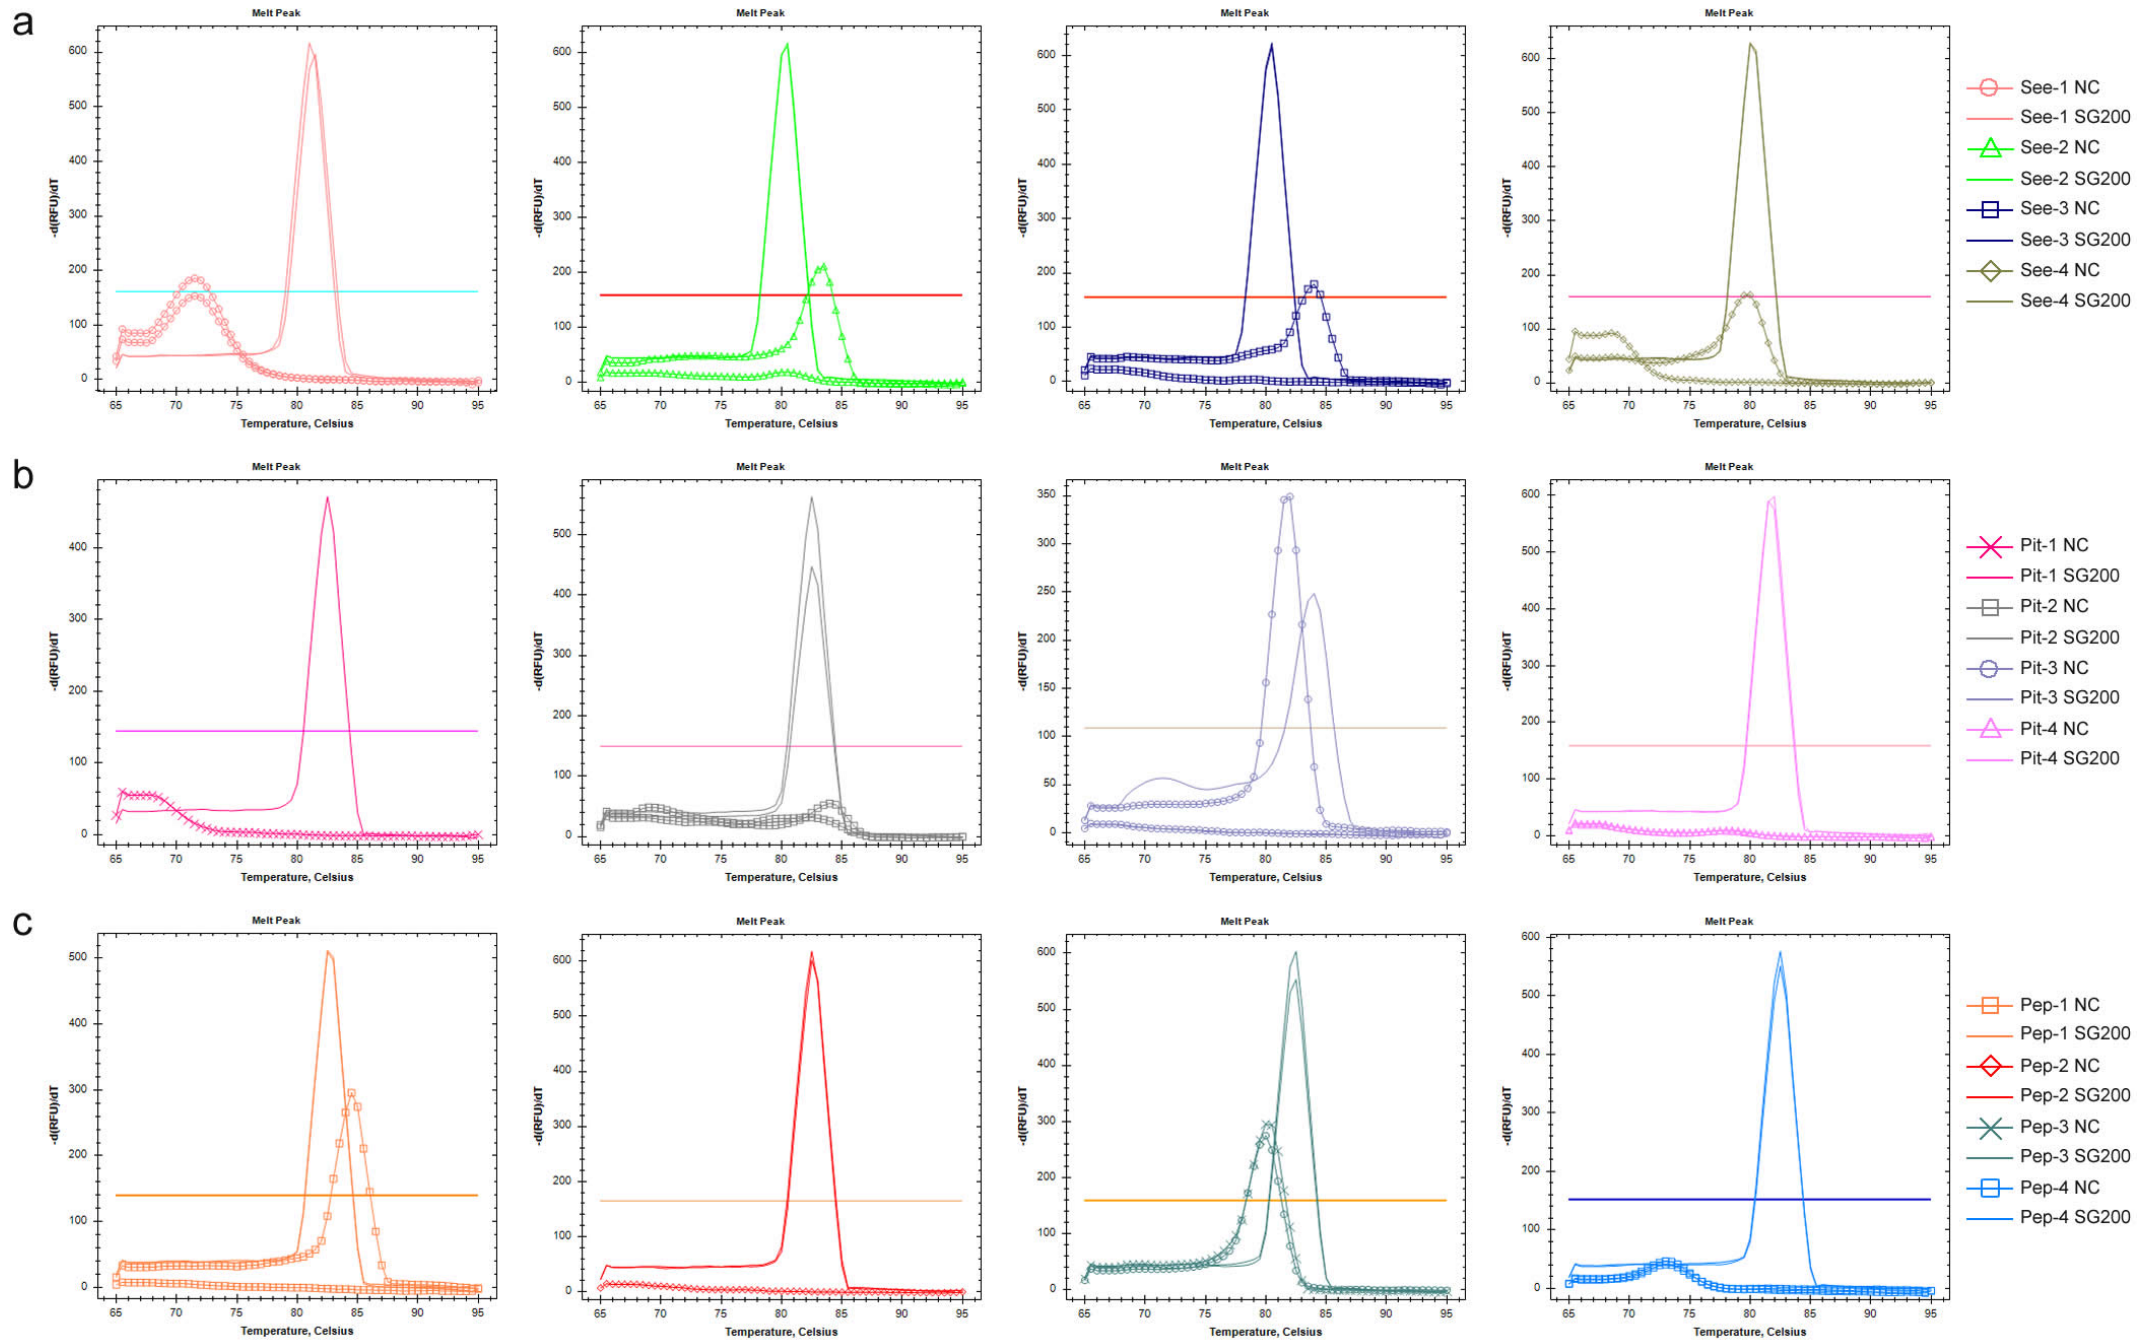

**Supplementary Figure S1. Melt peaks of primer screening for *Ustilago maydis* LAMP reaction.** 1–4 indicates one of the four sets of primers each designed for *See1*, *Pit2* and *Pep1*, respectively. NC indicates the negative control reactions.

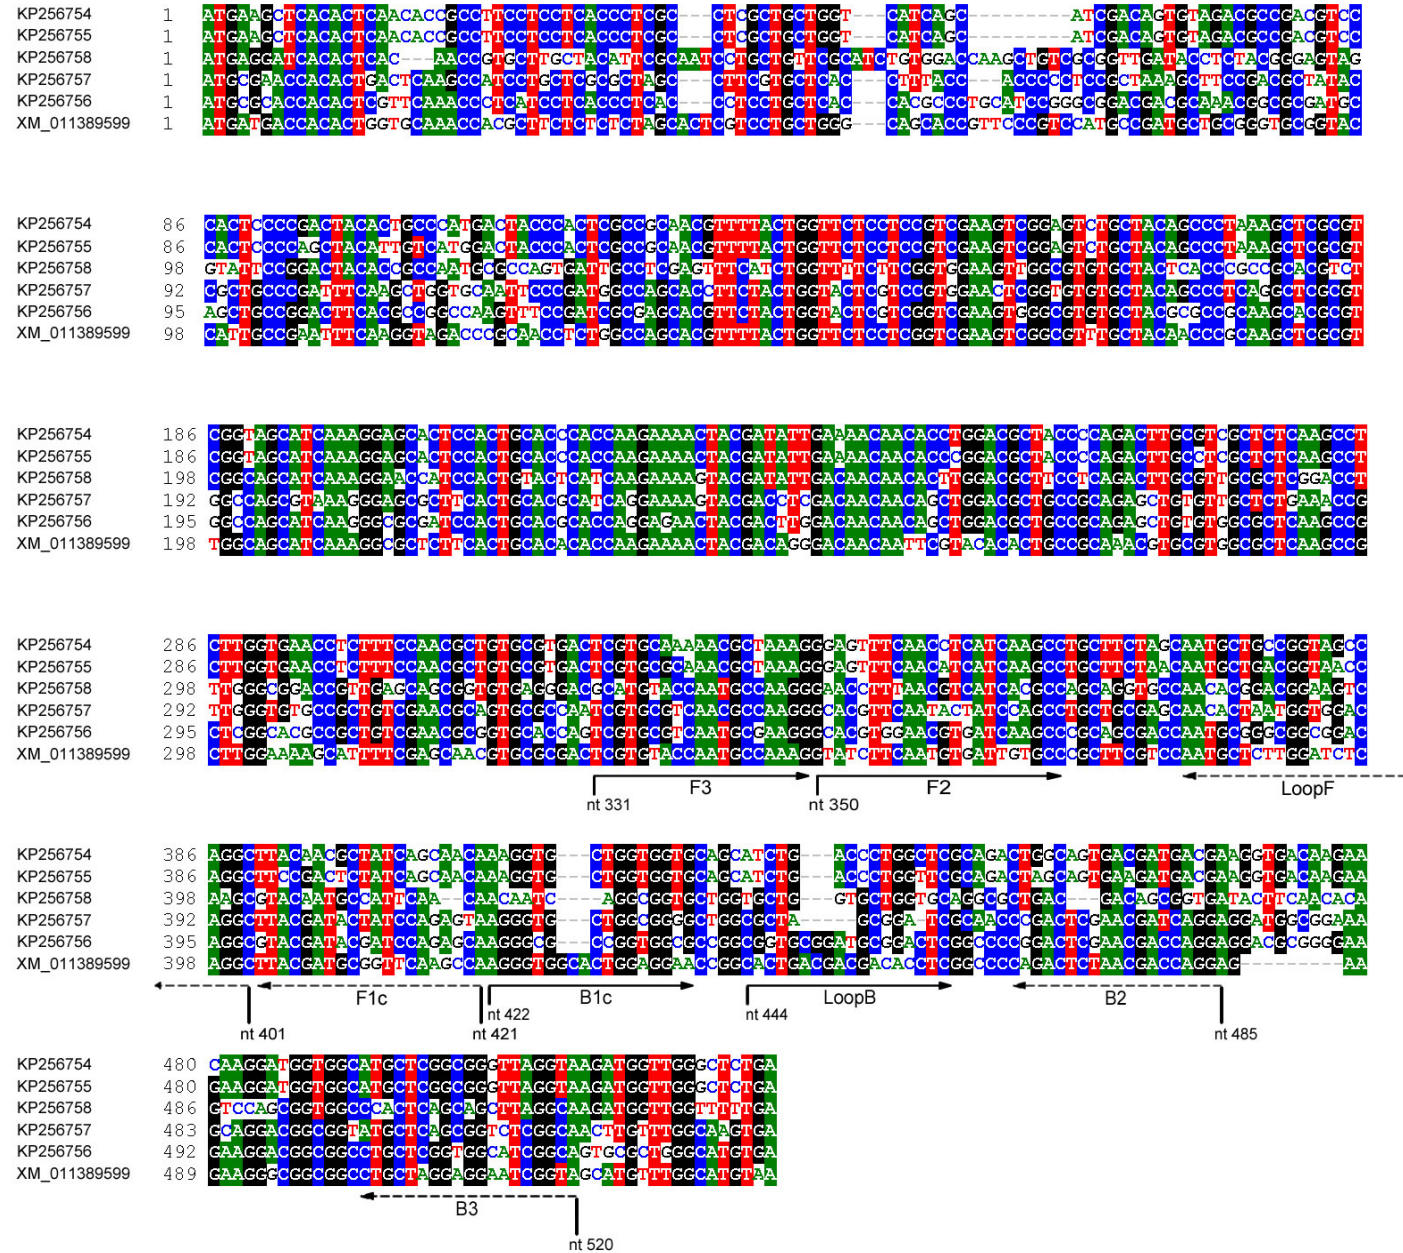

**Supplementary Figure S2. The alignment of different *Pep1* orthologues and the specific sequences of *Ustilago maydis* *Pep1* LAMP primer set *Pep-2*.** The alignment was performed using BioEdit (v7.2.5, <http://www.mbio.ncsu.edu/bioedit/bioedit.html>). Sequences of *Pep1* genes analyzed in the alignment were obtained from GenBank. Accessions were as follows: *U. avenae Pep1*, KP256754; *U. nuda Pep1*, KP256755; *Sporisorium reilianum Pep1*, KP256756; *S. scitamineum Pep1*, KP256757; *Melanopsichium pennsylvanicum Pep1*, KP256758 and *U. maydis Pep1*, XM\_011389599. The respective binding sites of *Pep-2* primers are indicated by arrows.

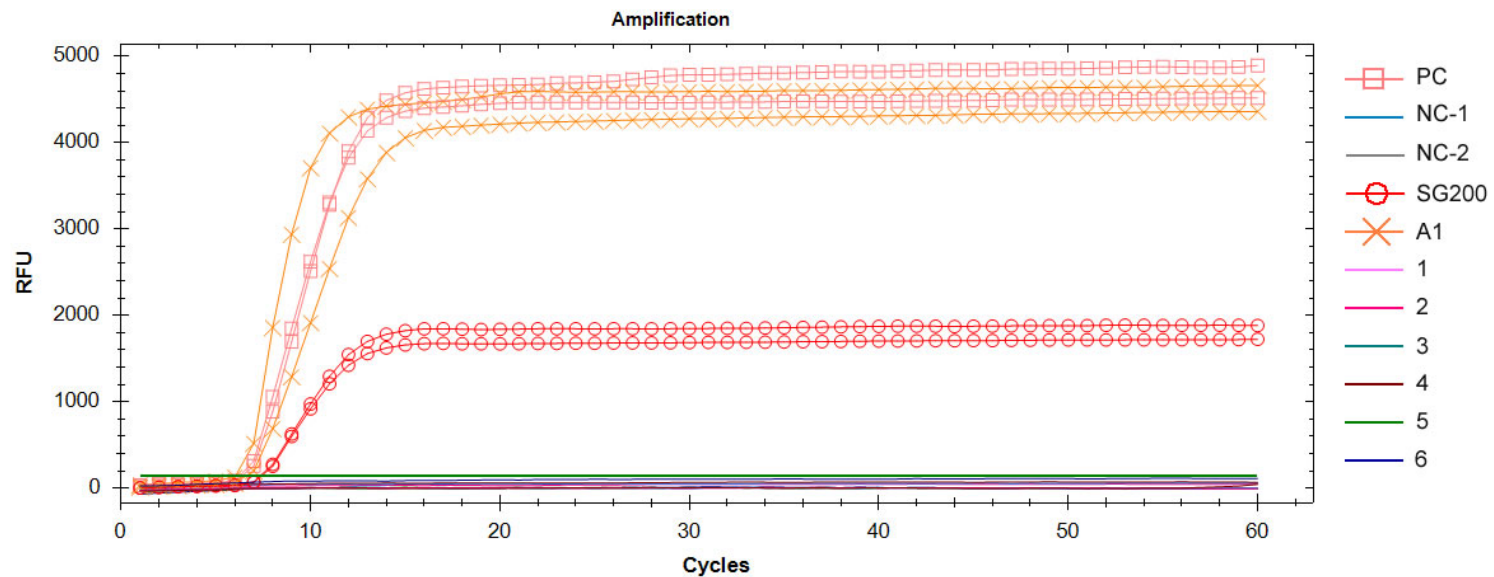

**Supplementary Figure S3. Specificity test of RealAmp assay for the detection of *Ustilago maydis* using diluted templates.** The RealAmp fluorescence (RFU) vs. Cq [threshold time (min)] amplification curve graph was plotted automatically by the Bio-Rad CFX96 Real-Time PCR system. The samples used are indicated as follows: PC, positive control (*Staphylococcus aureus*); NC-1, negative control 1 (*Salmonella choleraesuis*); NC-2, negative control 2 (*Salmonella bongori*); SG200, *U. maydis* strain SG-200; A1, *U. maydis* strain A1; 1 (*Curvularia lunata*), 2 (*Bipolaris maydis*), 3 (*Colletotrichum truncatum*), 4 (*Fusarium moniliforme*), 5 (*F. graminearum*), 6 (*Pythium inflatum*).

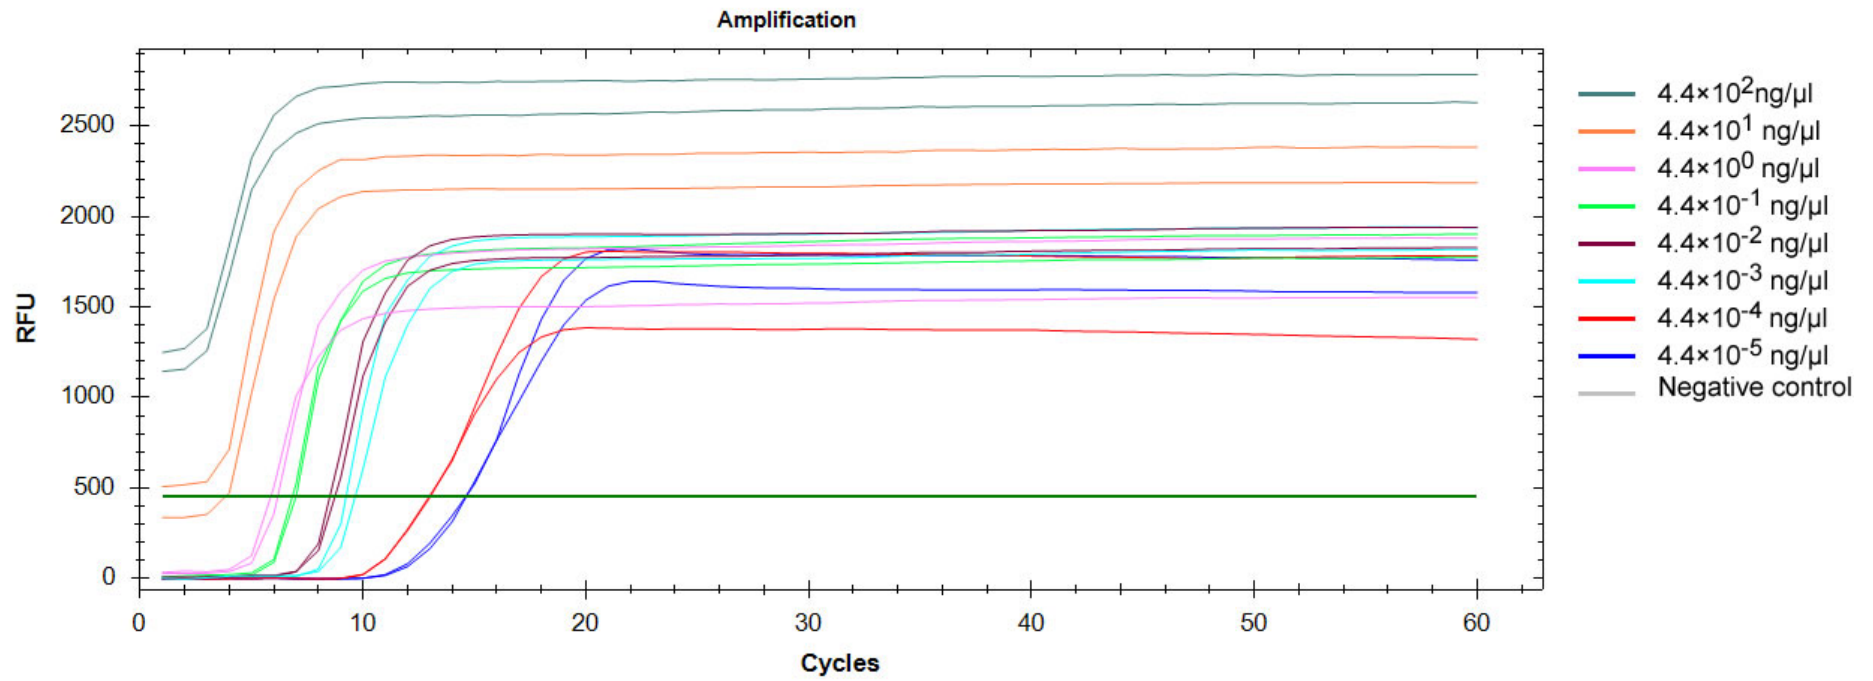

**Supplementary Figure S4. Sensitivity test of *Ustilago maydis* RealAmp using extensive range of plasmid DNA.** The Real-Time fluorescence units were plotted against the Log<sub>10</sub>-transformed initial concentration of plasmid DNA ranging from 4.4×10<sup>2</sup> ng/μl to 4.4×10<sup>-5</sup> ng/μl by the CFX96 Real-Time PCR system.

**a**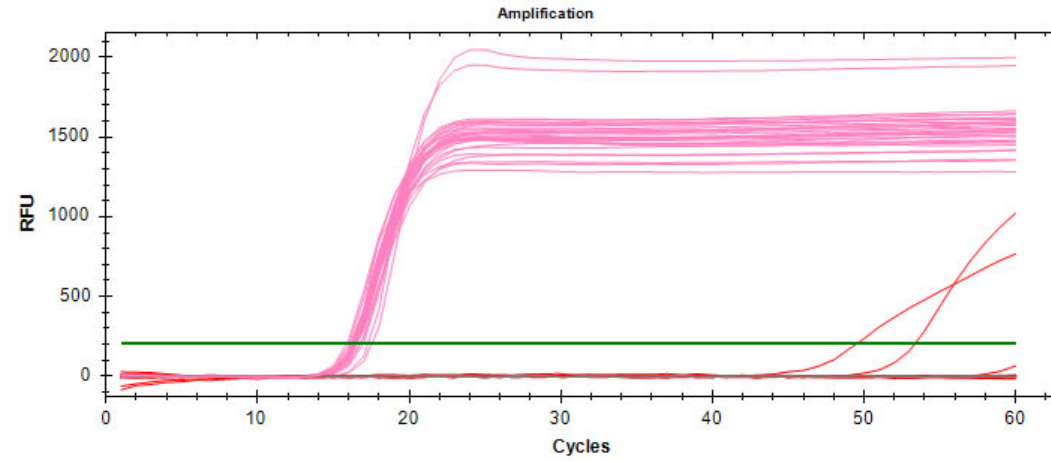

—  $4.4 \times 10^{-5}$  ng/ $\mu$ l —  $4.4 \times 10^{-6}$  ng/ $\mu$ l —  $4.4 \times 10^{-7}$  ng/ $\mu$ l — Negative control

**b**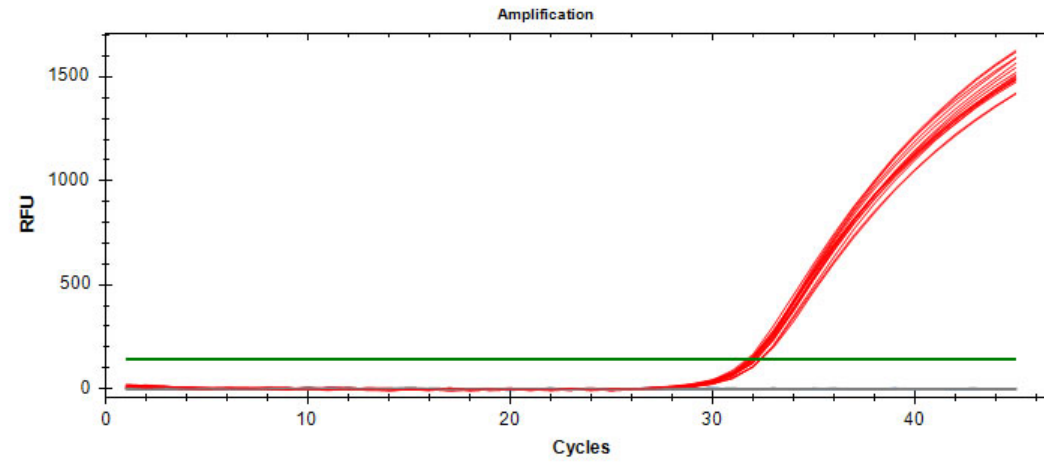

**Supplementary Figure S5. Determination of the detection limit of RealAmp.** The reactions were conducted by RealAmp (a) and real-time PCR (b) using  $10^{-7}/10^{-8}$  and  $10^{-8}/10^{-9}$  concentrations of the original plasmid template ( $4.4 \times 10^2$  ng/ $\mu$ l). These reactions were repeated 30 times and 20 times, respectively.

|                                  |     |                                                                                                      |
|----------------------------------|-----|------------------------------------------------------------------------------------------------------|
| Pep-2 target segments            | 1   | -----                                                                                                |
| Reverse_complement_pEasy-Pep (1) | 1   | CGGGCACACAGCCAGCTTGGAGCGAACGACCTACACCGAAGCTGAGATACCTACAGCGTGAGCTATGAGAAAGCGCCACGCTTCCCAGGGGAGAAAGGC  |
| Reverse_complement_pEasy-Pep (2) | 1   | -----ACAGCCAGCTTGGAGCGAACGACCTACACCGAAGCTGAGATACCTACAGCGTGAGCTATGAGAAAGCGCCACGCTTCCCAGGGGAGAAAGGC    |
| Reverse_complement_pEasy-Pep (3) | 1   | -----AGCCAGCTTGGAGCGAACGACCTACACCGAAGCTGAGATACCTACAGCGTGAGCTATGAGAAAGCGCCACGCTTCCCAGGGGAGAAAGGC      |
| Pep-2 target segments            | 1   | -----                                                                                                |
| Reverse_complement_pEasy-Pep (1) | 100 | GGACAGGTATCCGGTAAGCGGCAGGGTCGGAACAGGAGAGCGCACAGGGAGCTTCCAGGGGAGAAAGCGCTGGTATCTTTATAGTCTGTTCGGGTTTCGC |
| Reverse_complement_pEasy-Pep (2) | 94  | GGACAGGTATCCGGTAAGCGGCAGGGTCGGAACAGGAGAGCGCACAGGGAGCTTCCAGGGGAGAAAGCGCTGGTATCTTTATAGTCTGTTCGGGTTTCGC |
| Reverse_complement_pEasy-Pep (3) | 91  | GGACAGGTATCCGGTAAGCGGCAGGGTCGGAACAGGAGAGCGCACAGGGAGCTTCCAGGGGAGAAAGCGCTGGTATCTTTATAGTCTGTTCGGGTTTCGC |
| Pep-2 target segments            | 1   | -----                                                                                                |
| Reverse_complement_pEasy-Pep (1) | 200 | CACCTCTGACTTGAGCGTCGATTTTTGTGATGCTCGTCAGGGGGCGGAGCCTATGGAAAAACGCCAGCAACGCGGCTTTTTACGGTTCCTGGCCTTTTT  |
| Reverse_complement_pEasy-Pep (2) | 194 | CACCTCTGACTTGAGCGTCGATTTTTGTGATGCTCGTCAGGGGGCGGAGCCTATGGAAAAACGCCAGCAACGCGGCTTTTTACGGTTCCTGGCCTTTTT  |
| Reverse_complement_pEasy-Pep (3) | 191 | CACCTCTGACTTGAGCGTCGATTTTTGTGATGCTCGTCAGGGGGCGGAGCCTATGGAAAAACGCCAGCAACGCGGCTTTTTACGGTTCCTGGCCTTTTT  |
| Pep-2 target segments            | 1   | -----                                                                                                |
| Reverse_complement_pEasy-Pep (1) | 300 | GCTGGCCTTTTTGCTCACATGTTCTTTCTGCGTTATCCCTGATTCTGTGGATAACCGTATTACCGCCTTTGAGTGAGCTGATACCGCTCGCCGAGCCG   |
| Reverse_complement_pEasy-Pep (2) | 294 | GCTGGCCTTTTTGCTCACATGTTCTTTCTGCGTTATCCCTGATTCTGTGGATAACCGTATTACCGCCTTTGAGTGAGCTGATACCGCTCGCCGAGCCG   |
| Reverse_complement_pEasy-Pep (3) | 291 | GCTGGCCTTTTTGCTCACATGTTCTTTCTGCGTTATCCCTGATTCTGTGGATAACCGTATTACCGCCTTTGAGTGAGCTGATACCGCTCGCCGAGCCG   |
| Pep-2 target segments            | 1   | -----                                                                                                |
| Reverse_complement_pEasy-Pep (1) | 400 | AACGACCAGCGCAGCGACTCAGTGAGCGAGGAAGCGGAAGAGCGCCCAATACGCAAAACCGCCTCTCCCGCGCGTTGGCCGATTCAATTAATCGAGCTGG |
| Reverse_complement_pEasy-Pep (2) | 394 | AACGACCAGCGCAGCGACTCAGTGAGCGAGGAAGCGGAAGAGCGCCCAATACGCAAAACCGCCTCTCCCGCGCGTTGGCCGATTCAATTAATCGAGCTGG |
| Reverse_complement_pEasy-Pep (3) | 391 | AACGACCAGCGCAGCGACTCAGTGAGCGAGGAAGCGGAAGAGCGCCCAATACGCAAAACCGCCTCTCCCGCGCGTTGGCCGATTCAATTAATCGAGCTGG |
| Pep-2 target segments            | 1   | -----                                                                                                |
| Reverse_complement_pEasy-Pep (1) | 500 | CACGACAGGTTTCCCGACTGGAAAGCGGGCAGTGAGCGCAACGCAATTAATGTGAGTTAGCTCACTCATTAGGCACCCAGGCTTTACACTTTATGCTTC  |
| Reverse_complement_pEasy-Pep (2) | 494 | CACGACAGGTTTCCCGACTGGAAAGCGGGCAGTGAGCGCAACGCAATTAATGTGAGTTAGCTCACTCATTAGGCACCCAGGCTTTACACTTTATGCTTC  |
| Reverse_complement_pEasy-Pep (3) | 491 | CACGACAGGTTTCCCGACTGGAAAGCGGGCAGTGAGCGCAACGCAATTAATGTGAGTTAGCTCACTCATTAGGCACCCAGGCTTTACACTTTATGCTTC  |
| Pep-2 target segments            | 1   | -----                                                                                                |
| Reverse_complement_pEasy-Pep (1) | 600 | CGGCTCGTATGTTGTGTGGAATTTGAGCGGATAACAATTTACACAGGAAACAGCTATGACCATGATTACGCCAAGCTTGGTACCGAGCTCGGATCCAC   |
| Reverse_complement_pEasy-Pep (2) | 594 | CGGCTCGTATGTTGTGTGGAATTTGAGCGGATAACAATTTACACAGGAAACAGCTATGACCATGATTACGCCAAGCTTGGTACCGAGCTCGGATCCAC   |
| Reverse_complement_pEasy-Pep (3) | 591 | CGGCTCGTATGTTGTGTGGAATTTGAGCGGATAACAATTTACACAGGAAACAGCTATGACCATGATTACGCCAAGCTTGGTACCGAGCTCGGATCCAC   |
| Pep-2 target segments            | 1   | -----TACCGATTCTCTAGCAGGCCGCCGCCCTTCTTCTCCTGGTTCGTTAGAGTCTGGGGCCGAGGTGT                               |
| Reverse_complement_pEasy-Pep (1) | 700 | TAGTAACGGCCCGCAGTGTGCTGGAATTTGCCCTTTACCGATTCTCTAGCAGGCCGCCGCCCTTCTTCTCCTGGTTCGTTAGAGTCTGGGGCCGAGGTGT |
| Reverse_complement_pEasy-Pep (2) | 694 | TAGTAACGGCCCGCAGTGTGCTGGAATTTGCCCTTTACCGATTCTCTAGCAGGCCGCCGCCCTTCTTCTCCTGGTTCGTTAGAGTCTGGGGCCGAGGTGT |
| Reverse_complement_pEasy-Pep (3) | 691 | TAGTAACGGCCCGCAGTGTGCTGGAATTTGCCCTTTACCGATTCTCTAGCAGGCCGCCGCCCTTCTTCTCCTGGTTCGTTAGAGTCTGGGGCCGAGGTGT |
| Pep-2 target segments            | 67  | CGTCGTGAGTGCAGGTTCTCCAGTGCCACCCCTTGGCTTGAACCGCATCGTAAGCCTGAGATCCAAGAGCATTGGACGAAGCGGGCACAATCACATTGAA |
| Reverse_complement_pEasy-Pep (1) | 800 | CGTCGTGAGTGCAGGTTCTCCAGTGCCACCCCTTGGCTTGAACCGCATCGTAAGCCTGAGATCCAAGAGCATTGGACGAAGCGGGCACAATCACATTGAA |
| Reverse_complement_pEasy-Pep (2) | 794 | CGTCGTGAGTGCAGGTTCTCCAGTGCCACCCCTTGGCTTGAACCGCATCGTAAGCCTGAGATCCAAGAGCATTGGACGAAGCGGGCACAATCACATTGAA |
| Reverse_complement_pEasy-Pep (3) | 791 | CGTCGTGAGTGCAGGTTCTCCAGTGCCACCCCTTGGCTTGAACCGCATCGTAAGCCTGAGATCCAAGAGCATTGGACGAAGCGGGCACAATCACATTGAA |
| Pep-2 target segments            | 167 | GATACCTTTGGCATTGGTACACGA                                                                             |
| Reverse_complement_pEasy-Pep (1) | 900 | GATACCTTTGGCATTGGTACACGAAGGGCAATTTCTGCAGATATCCATCACACTGGCGGCCCTCGAGCATGCATCTAGAGGGCCCAATCGCCCTATAG   |
| Reverse_complement_pEasy-Pep (2) | 894 | GATACCTTTGGCATTGGTACACGAAGGGCAATTTCTGCAGATATCCATCACACTGGCGGCCCTCGAGCATGCATCTAGAGGGCCCAATCGCCCTATAG   |
| Reverse_complement_pEasy-Pep (3) | 891 | GATACCTTTGGCATTGGTACACGAAGGGCAATTTCTGCAGATATCCATCACACTGGCGGCCCTCGAGCATGCATCTAGAGGGCCCAATCGCCCTATAGA  |
| Pep-2 target segments            | 190 | -----                                                                                                |
| Reverse_complement_pEasy-Pep (1) | 999 | ACTCTCCA                                                                                             |
| Reverse_complement_pEasy-Pep (2) | 994 | ACTCAC                                                                                               |
| Reverse_complement_pEasy-Pep (3) | 991 | GTTATCCA                                                                                             |

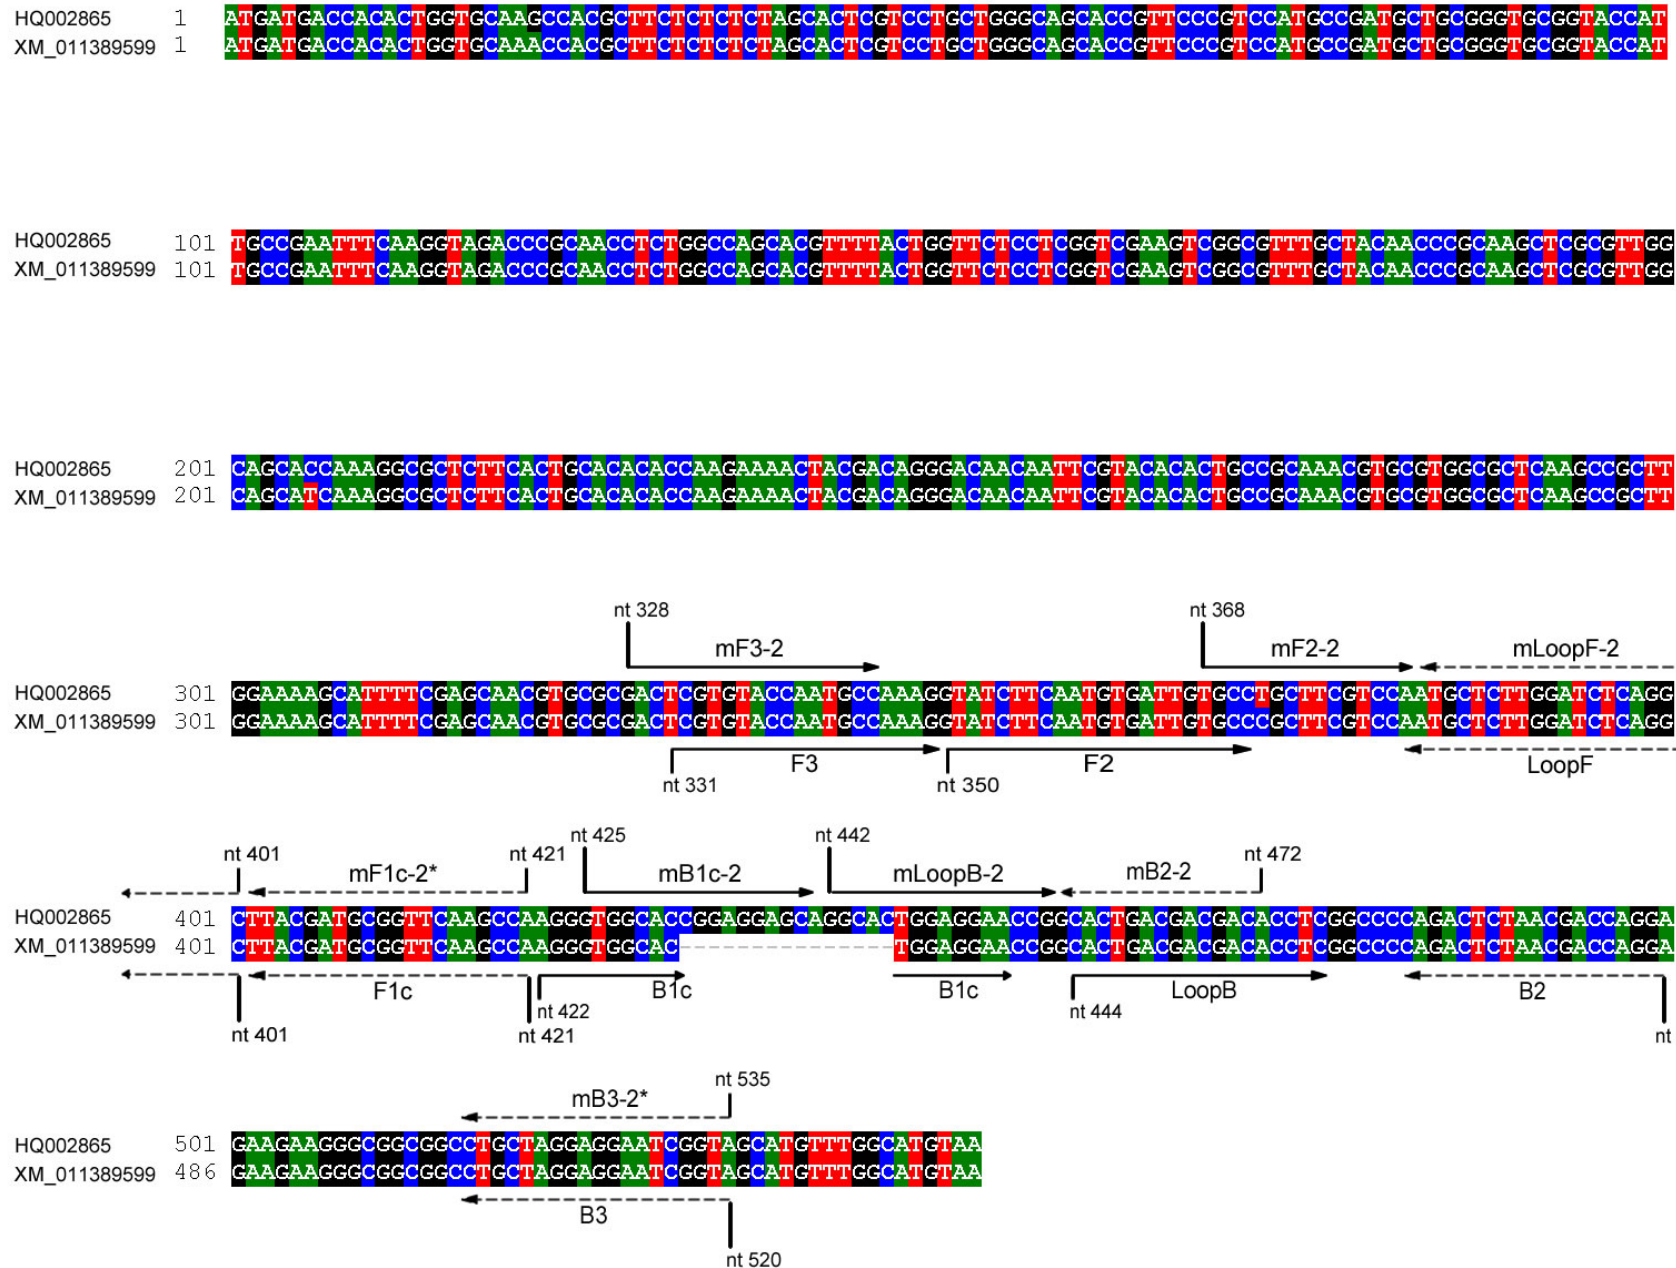

**Supplementary Figure S7. The alignment of two clades of *Ustilago maydis* *Pep1* and the specific sequences of *Pep1* RealAmp primer sets *Pep-2* and *mPep-2*.** Sequences of *Pep1* genes obtained from Clade A (XM\_011389599) and Clade B (HQ002865) were analyzed in the alignment using BioEdit software (v7.2.5, <http://www.mbio.ncsu.edu/bioedit/bioedit.html>). The sequences and respective binding sites of *Pep-2* and *mPep-2* primers that targeting *Pep1* gene from clade A and clade B were indicated by arrows, respectively.



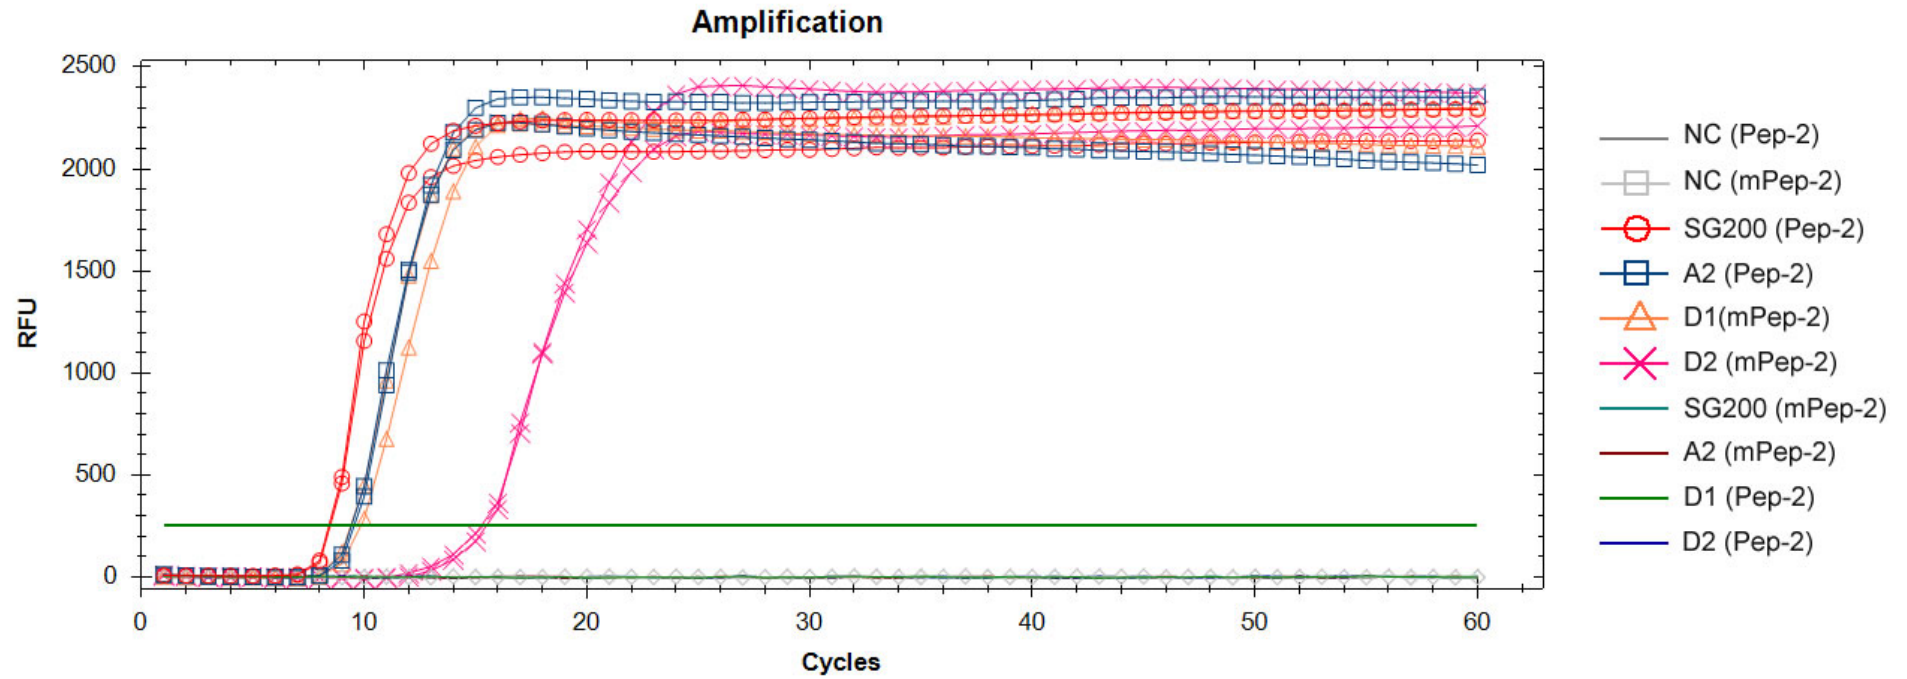

**Supplementary Figure S8. Specificity test of RealAmp assay for the detection of two clades of *Ustilago maydis* using the LAMP primer sets Pep-2 and mPep-2.** The RealAmp fluorescence (RFU) vs. Cq [threshold time (min)] amplification curve graph was plotted automatically by the Bio-Rad CFX96 Real-Time PCR system. The samples used are indicated as follows: NC, negative control (*Salmonella choleraesuis*), *U. maydis* clade A strains SG200 and A2, *U. maydis* clade B strains D1 and D2. For each sample, two sets of LAMP primer Pep-2 and mPep-2 that designed for the *Pep1* genes of clade A and clade B *U. maydis* were employed for the amplification, respectively.

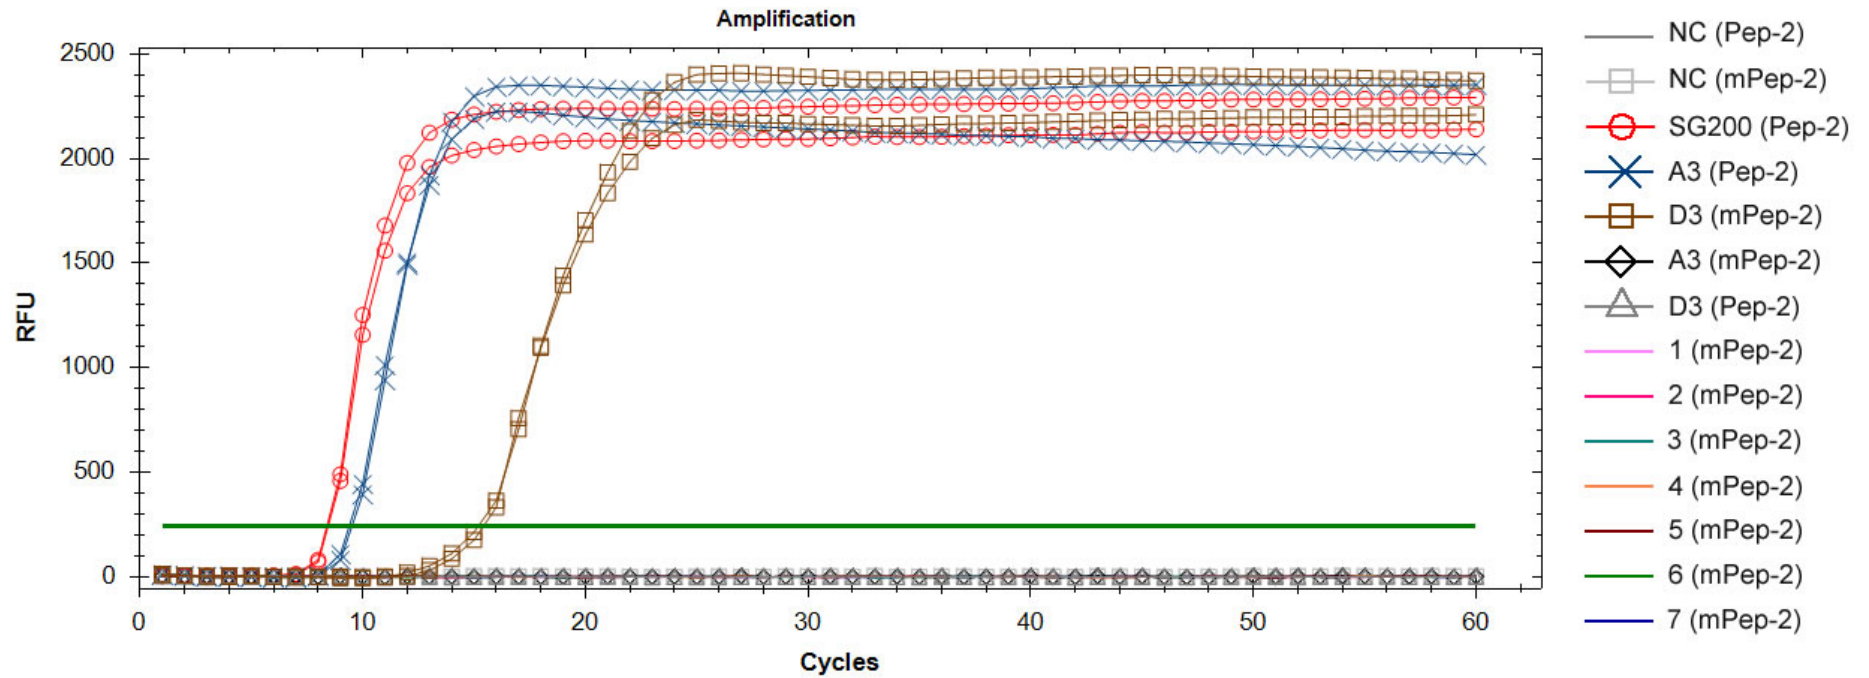

**Supplementary Figure S9. Specificity test of RealAmp assay for the detection of *Ustilago maydis* using primer set mPep-2.** The RealAmp fluorescence (RFU) vs. Cq [threshold time (min)] amplification curve graph was plotted automatically by the Bio-Rad CFX96 Real-Time PCR system. The templates consisted of genomic DNA isolated from the following control, two clades of *U. maydis* strains and other pathogens: NC, negative control (*Salmonella choleraesuis*); *U. maydis* clade A strains SG200 and A3, *U. maydis* clade B strain D3, 1, *Curvularia lunata*; 2, *Bipolaris maydis*; 3, *Colletotrichum truncatum*; 4, *Sporisorium reiliana*; 5, *Fusarium moniliforme*; 6, *F. graminearum*; 7, *Pythium inflatum*. For the NC, A3 and D3 templates, two sets of LAMP primer Pep-2 and mPep-2 that designed for the *Pep1* genes of clade A and clade B *U. maydis* were employed for the amplification, whereas for the other templates, the mPep-2 was solely used for the reaction.

**Supplementary Table S1. The screening of different sets of primers used for *Ustilago maydis* real-time fluorescence loop-mediated isothermal amplification**

| Name*             | Primer sequences (5' to 3')                                                                                                                                             | Position | Length |
|-------------------|-------------------------------------------------------------------------------------------------------------------------------------------------------------------------|----------|--------|
| See-F3-1          | GCCATCAACAAGAATTCGC                                                                                                                                                     | 265      | 19     |
| See-B3-1          | TCGGCCCAAATTTATACTCTC                                                                                                                                                   | 466      | 21     |
| See-FIP(F1c+F2)-1 | CTGCCTGTCGTACGTGAACTCCACGGAGGACTACATAGACT                                                                                                                               |          | 41     |
| See-BIP(B1c+B2)-1 | CTCGTACAGGTATGGCGATAGCCAGAAGCAGACTGGTGATC                                                                                                                               |          | 41     |
| See-LoopF-1       | CCTTCTCCTTGACCTGAG                                                                                                                                                      | 332      | 19     |
| See-LoopB-1       | AAGCGGAGTATTCTGTTGCT                                                                                                                                                    | 407      | 20     |
| See-F2-1          | CACGGAGGACTACATAGACT                                                                                                                                                    | 289      | 20     |
| See-F1c-1         | CTGCCTGTCGTACGTGAACTC                                                                                                                                                   | 354      | 21     |
| See-B2-1          | CAGAAGCAGACTGGTGATC                                                                                                                                                     | 445      | 19     |
| See-B1c-1         | CTCGTACAGGTATGGCGATAGC                                                                                                                                                  | 369      | 22     |
| Product           | CACGGAGGACTACATAGACTTCCGGCTCAGGTGCAAGGAGAAGGCCGAGTTTCACGTACGACAGGCAGAGAA<br>ATGCAGTCGGCTCGTACAGGTATGGCGATAGCCATGGTAACAGTAGGGAAGCGGAGTATTCTGTTGCTGATC<br>ACCAGTCTGCTTCTG |          | 157    |
| See-F3-2          | CTTACCACCTTCGTTTCA                                                                                                                                                      | 6        | 19     |
| See-B3-2          | CGCTCGTGAATCTGTTCA                                                                                                                                                      | 224      | 18     |
| See-FIP(F1c+F2)-2 | CAATGGCAGAGGACGAACGACTCCTCGTCATACTCTGTCT                                                                                                                                |          | 40     |
| See-BIP(B1c+B2)-2 | GCAAGCAGAAGCACAAGATCAAGCTCGATGCTGTCTTCAG                                                                                                                                |          | 40     |
| See-LoopF-2       | GTAGAGGATGAGCAGACACG                                                                                                                                                    | 73       | 20     |
| See-LoopB-2       | GCAATTTGAAGAGGAGATCGC                                                                                                                                                   | 129      | 21     |
| See-F2-2          | CTCCTCGTCATACTCTGTCT                                                                                                                                                    | 28       | 20     |
| See-F1c-2         | CAATGGCAGAGGACGAACGA                                                                                                                                                    | 100      | 20     |
| See-B2-2          | GCTCGATGCTGTCTTCAG                                                                                                                                                      | 175      | 18     |

|                   |                                                                                                                                                                      |     |     |
|-------------------|----------------------------------------------------------------------------------------------------------------------------------------------------------------------|-----|-----|
| See-B1c-2         | GCAAGCAGAAGCACAAGATCAA                                                                                                                                               | 101 | 22  |
| Product           | CTCCTCGTCATACTCTGTCTTGCCACGTGTCTGCTCATCCTCTACAATCGTTTCGTTTCGTCTCTGCCATTG<br>GCAAGCAGAAGCACAAGATCAAGTCTAGGCAATTTGAAGAGGAGATCGCGCAAGGTGCTGAAGACAGCATC<br>GAGC          |     | 148 |
| See-F3-3          | CTCCTCGTCATACTCTGTCT                                                                                                                                                 | 28  | 20  |
| See-B3-3          | GTTTTGTTGCTCTGTGCG                                                                                                                                                   | 240 | 18  |
| See-FIP(F1c+F2)-3 | GATCTTGTGCTTCTGCTTGCCGTCTGCTCATCCTCTACAATC                                                                                                                           |     | 42  |
| See-BIP(B1c+B2)-3 | ATCGCGCAAGGTGCTGAATTCAGACGAATCGTGAACC                                                                                                                                |     | 37  |
| See-LoopF-3       | AATGGCAGAGGACGAACG                                                                                                                                                   | 99  | 18  |
| See-LoopB-3       | CGAGCTGTTTCGAGTTTCCT                                                                                                                                                 | 171 | 19  |
| See-F2-3          | GTCTGCTCATCCTCTACAATC                                                                                                                                                | 57  | 21  |
| See-F1c-3         | GATCTTGTGCTTCTGCTTGCC                                                                                                                                                | 120 | 21  |
| See-B2-3          | TTCAGACGAATCGTGAACC                                                                                                                                                  | 210 | 19  |
| See-B1c-3         | ATCGCGCAAGGTGCTGAA                                                                                                                                                   | 145 | 18  |
| Product           | GTCTGCTCATCCTCTACAATCGTTTCGTTTCGTCCTCTGCCATTGGCAAGCAGAAGCACAAGATCAAGTCTAGG<br>CAATTTGAAGAGGAGATCGCGCAAGGTGCTGAAGACAGCATCGAGCTGTTTCGAGTTTCCTCGGGTTCACGA<br>TTCGTCTGAA |     | 154 |
| See-F3-4          | CACCTTCGTTTCACTGCT                                                                                                                                                   | 12  | 18  |
| See-B3-4          | GTTTTGTTGCTCTGTGCG                                                                                                                                                   | 240 | 18  |
| See-FIP(F1c+F2)-4 | CAATGGCAGAGGACGAACGACATACTCTGTCTTGCCACG                                                                                                                              |     | 40  |
| See-BIP(B1c+B2)-4 | ATCGCGCAAGGTGCTGAATTCAGACGAATCGTGAACC                                                                                                                                |     | 37  |
| See-LoopF-4       | AACGATTGTAGAGGATGAGCAG                                                                                                                                               | 80  | 22  |
| See-LoopB-4       | CGAGCTGTTTCGAGTTTCCT                                                                                                                                                 | 171 | 19  |
| See-F2-4          | CATACTCTGTCTTGCCACG                                                                                                                                                  | 36  | 20  |
| See-F1c-4         | CAATGGCAGAGGACGAACGA                                                                                                                                                 | 100 | 20  |

|                   |                                                                                                                                                                                         |     |     |
|-------------------|-----------------------------------------------------------------------------------------------------------------------------------------------------------------------------------------|-----|-----|
| See-B2-4          | TTCAGACGAATCGTGAACC                                                                                                                                                                     | 210 | 19  |
| See-B1c-4         | ATCGCGCAAGGTGCTGAA                                                                                                                                                                      | 145 | 18  |
| Product           | CATACTCTGTCTTGTCCACGTGTCTGCTCATCCTCTACAATCGTTTCGTTTCGTCTCTGCCATTGGCAAGCAG<br>AAGCACAAGATCAAGTCTAGGCAATTTGAAGAGGAGATCGCGCAAGGTGCTGAAGACAGCATCGAGCTGTT<br>CGAGTTTCCTCGGGTTCACGATTCGTCTGAA |     | 175 |
| Pit-F3-1          | TTGTTCTGCTCATCGTGG                                                                                                                                                                      | 20  | 18  |
| Pit-B3-1          | CATGACCACCGTCTTGAAT                                                                                                                                                                     | 318 | 19  |
| Pit-FIP(F1c+F2)-1 | GCGAACCTGTGAAGCCGAATCTCTACCGATGCCTCAAT                                                                                                                                                  |     | 38  |
| Pit-BIP(B1c+B2)-1 | TCGGCAAGGAACCTGACAACGGCGGATTCTTGATGATGA                                                                                                                                                 |     | 39  |
| Pit-LoopF-1       | CCACCATCTCCGGTTGAG                                                                                                                                                                      | 150 | 18  |
| Pit-LoopB-1       | GGCCAAGTACAGATCAAGATCA                                                                                                                                                                  | 190 | 22  |
| Pit-F2-1          | TCTCTACCGATGCCTCAAT                                                                                                                                                                     | 95  | 19  |
| Pit-F1c-1         | GCGAACCTGTGAAGCCGAA                                                                                                                                                                     | 169 | 19  |
| Pit-B2-1          | GGCGGATTCTTGATGATGA                                                                                                                                                                     | 242 | 19  |
| Pit-B1c-1         | TCGGCAAGGAACCTGACAAC                                                                                                                                                                    | 170 | 20  |
| Product           | TCTCTACCGATGCCTCAATGAGCTCGGCTGCTGGCAAGCTCAACCGGAGATGGTGGTTCGGCTTCACAGGT<br>TCGCTCGGCAAGGAACCTGACAACGGCCAAGTACAGATCAAGATCATCCCAGACGCGCTCATCATCAAGAAT<br>CCGCC                            |     | 148 |
| Pit-F3-2          | TTGTTCTGCTCATCGTGG                                                                                                                                                                      | 20  | 18  |
| Pit-B3-2          | ACCACCGTCTTGAATCTTG                                                                                                                                                                     | 314 | 19  |
| Pit-FIP(F1c+F2)-2 | GCGAACCTGTGAAGCCGAATCTCTACCGATGCCTCAAT                                                                                                                                                  |     | 38  |
| Pit-BIP(B1c+B2)-2 | TCGGCAAGGAACCTGACAACGGCGGATTCTTGATGATGA                                                                                                                                                 |     | 39  |
| Pit-LoopF-2       | CCACCATCTCCGGTTGAG                                                                                                                                                                      | 150 | 18  |
| Pit-LoopB-2       | GGCCAAGTACAGATCAAGATCA                                                                                                                                                                  | 190 | 22  |

|                   |                                                                                                                                                                |     |     |
|-------------------|----------------------------------------------------------------------------------------------------------------------------------------------------------------|-----|-----|
| Pit-F2-2          | TCTCTACCGATGCCTCAAT                                                                                                                                            | 95  | 19  |
| Pit-F1c-2         | GCGAACCTGTGAAGCCGAA                                                                                                                                            | 169 | 19  |
| Pit-B2-2          | GGCGGATTCTTGATGATGA                                                                                                                                            | 242 | 19  |
| Pit-B1c-2         | TCGGCAAGGAACCTGACAAC                                                                                                                                           | 170 | 20  |
| Product           | TCTCTACCGATGCCTCAATGAGCTCGGCTGCTGGCAAGCTCAACCGGAGATGGTGGTTCGGCTTCACAGGT<br>TCGCTCGGCAAGGAACCTGACAACGGCCAAGTACAGATCAAGATCATCCCAGACGCGCTCATCATCAAGAAT<br>CCGCC   |     | 148 |
| Pit-F3-3          | TTTCGCTCAGCCTTTGTT                                                                                                                                             | 7   | 18  |
| Pit-B3-3          | GGCGGATTCTTGATGATGA                                                                                                                                            | 242 | 19  |
| Pit-FIP(F1c+F2)-3 | GTTGAGCTTGCCAGCAGCCAACATGTTCAAGCTATTCCG                                                                                                                        |     | 39  |
| Pit-BIP(B1c+B2)-3 | GTGGTTCGGCTTCACAGGTTGATCTTGATCTGTACTIONTGGC                                                                                                                    |     | 40  |
| Pit-LoopF-3       | GCTCATTGAGGCATCGGTA                                                                                                                                            | 117 | 19  |
| Pit-LoopB-3       | CGGCAAGGAACCTGACAA                                                                                                                                             | 171 | 18  |
| Pit-F2-3          | CAACATGTTCAAGCTATTCCG                                                                                                                                          | 61  | 21  |
| Pit-F1c-3         | GTTGAGCTTGCCAGCAGC                                                                                                                                             | 138 | 18  |
| Pit-B2-3          | TGATCTTGATCTGTACTIONTGGC                                                                                                                                       | 211 | 21  |
| Pit-B1c-3         | GTGGTTCGGCTTCACAGGT                                                                                                                                            | 147 | 19  |
| Product           | CAACATGTTCAAGCTATTCCGGTGCGTCGATCGCTCTCTACCGATGCCTCAATGAGCTCGGCTGCTGGCAAG<br>CTCAACCGGAGATGGTGGTTCGGCTTCACAGGTTGCTCGGCAAGGAACCTGACAACGGCCAAGTACAGAT<br>CAAGATCA |     | 151 |
| Pit-F3-4          | TCTCTACCGATGCCTCAA                                                                                                                                             | 95  | 18  |
| Pit-B3-4          | TTAGGATCTGTCGGCATGA                                                                                                                                            | 332 | 19  |
| Pit-FIP(F1c+F2)-4 | TTGTCAGGTTCCCTTGCCGAGCAAGCTCAACCGGAGATG                                                                                                                        |     | 38  |
| Pit-BIP(B1c+B2)-4 | CATCCCAGACGCGCTCATGATTAGCTTGTTTCAGATCGTCT                                                                                                                      |     | 40  |
| Pit-LoopF-4       | AACCTGTGAAGCCGAACC                                                                                                                                             | 166 | 18  |

|                          |                                                                                                                                                          |     |     |
|--------------------------|----------------------------------------------------------------------------------------------------------------------------------------------------------|-----|-----|
| Pit-LoopB-4              | ATCAAGAATCCGCCTGCC                                                                                                                                       | 229 | 18  |
| Pit-F2-4                 | CAAGCTCAACCGGAGATG                                                                                                                                       | 129 | 18  |
| Pit-F1c-4                | TTGTCAGGTTCCCTTGCCGAG                                                                                                                                    | 188 | 20  |
| Pit-B2-4                 | GATTAGCTTGTTTCAGATCGTCT                                                                                                                                  | 273 | 22  |
| Pit-B1c-4                | CATCCCAGACGCGCTCAT                                                                                                                                       | 210 | 18  |
| Product                  | CAAGCTCAACCGGAGATGGTGGTTCCGGCTTCACAGGTTGCTCGGCAAGGAACCTGACAACGGCCAAGTAC<br>AGATCAAGATCATCCCAGACGCGCTCATCATCAAGAATCCGCCTGCCAACAAGACGATCTGAACAAGCTAAT<br>C |     | 145 |
|                          |                                                                                                                                                          |     |     |
| Pep-F3-1                 | GACTCGTGACCAATGCC                                                                                                                                        | 328 | 18  |
| Pep-B3-1                 | TACCGATTCCTCCTAGCAG                                                                                                                                      | 520 | 19  |
| Pep-FIP(F1c+F2)-1        | TGGCTTGAACCGCATCGTAAGGTATCTTCAATGTGATTGTGC                                                                                                               |     | 42  |
| Pep-BIP(B1c+B2)-1        | AGGGTGGCACTGGAGGAATCCTGGTCGTTAGAGTCTG                                                                                                                    |     | 37  |
| Pep-LoopF-1              | GCCTGAGATCCAAGAGCATT                                                                                                                                     | 401 | 20  |
| Pep-LoopB-1              | CACTGACGACGACACCTC                                                                                                                                       | 444 | 18  |
| Pep-F2-1                 | GGTATCTTCAATGTGATTGTGC                                                                                                                                   | 349 | 22  |
| Pep-F1c-1                | TGGCTTGAACCGCATCGTAA                                                                                                                                     | 421 | 20  |
| Pep-B2-1                 | TCCTGGTCGTTAGAGTCTG                                                                                                                                      | 485 | 19  |
| Pep-B1c-1                | AGGGTGGCACTGGAGGAA                                                                                                                                       | 422 | 18  |
| Product                  | GGTATCTTCAATGTGATTGTGCCCGCTTCGTCCAATGCTCTTGGATCTCAGGCTTACGATGCGGTTCAAGCCA<br>AGGGTGGCACTGGAGGAACCGGCACTGACGACGACACCTCGGCCCCAGACTCTAACGACCAGGA            |     | 137 |
| <b>Pep-F3-2</b>          | TCGTGTACCAATGCCAAAG                                                                                                                                      | 331 | 19  |
| <b>Pep-B3-2</b>          | TACCGATTCCTCCTAGCAG                                                                                                                                      | 520 | 19  |
| <b>Pep-FIP(F1c+F2)-2</b> | TGGCTTGAACCGCATCGTAAGTATCTTCAATGTGATTGTGCC                                                                                                               |     | 42  |
| <b>Pep-BIP(B1c+B2)-2</b> | AGGGTGGCACTGGAGGAATCCTGGTCGTTAGAGTCTG                                                                                                                    |     | 37  |

|                    |                                                                                                                                                                        |     |     |
|--------------------|------------------------------------------------------------------------------------------------------------------------------------------------------------------------|-----|-----|
| <b>Pep-LoopF-2</b> | GCCTGAGATCCAAGAGCATT                                                                                                                                                   | 401 | 20  |
| <b>Pep-LoopB-2</b> | CACTGACGACGACACCTC                                                                                                                                                     | 444 | 18  |
| <b>Pep-F2-2</b>    | GTATCTTCAATGTGATTGTGCC                                                                                                                                                 | 350 | 22  |
| <b>Pep-F1c-2</b>   | TGGCTTGAACCGCATCGTAA                                                                                                                                                   | 421 | 20  |
| <b>Pep-B2-2</b>    | TCCTGGTCGTTAGAGTCTG                                                                                                                                                    | 485 | 19  |
| <b>Pep-B1c-2</b>   | AGGGTGGCACTGGAGGAA                                                                                                                                                     | 422 | 18  |
| <b>Product</b>     | GTATCTTCAATGTGATTGTGCCCGCTTCGTCCAATGCTCTTGGATCTCAGGCTTACGATGCGGTTCAAGCCAA<br>GGGTGGCACTGGAGGAACCGGCACTGACGACGACACCTCGGCCCCAGACTCTAACGACCAGGA                           |     | 136 |
| Pep-F3-3           | CAACAATTCGTACACACTGC                                                                                                                                                   | 252 | 20  |
| Pep-B3-3           | TACCGATTCCTCCTAGCAG                                                                                                                                                    | 520 | 19  |
| Pep-FIP(F1c+F2)-3  | CGTAAGCCTGAGATCCAAGAGCGACTCGTGTACCAATGCC                                                                                                                               |     | 40  |
| Pep-BIP(B1c+B2)-3  | AAGGGTGGCACTGGAGGATCCTGGTCGTTAGAGTCTG                                                                                                                                  |     | 37  |
| Pep-LoopF-3        | CGGGCACAATCACATTGAAG                                                                                                                                                   | 373 | 20  |
| Pep-LoopB-3        | CACTGACGACGACACCTC                                                                                                                                                     | 444 | 18  |
| Pep-F2-3           | GACTCGTGTACCAATGCC                                                                                                                                                     | 328 | 18  |
| Pep-F1c-3          | CGTAAGCCTGAGATCCAAGAGC                                                                                                                                                 | 406 | 22  |
| Pep-B2-3           | TCCTGGTCGTTAGAGTCTG                                                                                                                                                    | 485 | 19  |
| Pep-B1c-3          | AAGGGTGGCACTGGAGGA                                                                                                                                                     | 421 | 18  |
| <b>Product</b>     | GACTCGTGTACCAATGCCAAAGGTATCTTCAATGTGATTGTGCCCGCTTCGTCCAATGCTCTTGGATCTCAGG<br>CTTACGATGCGGTTCAAGCCAAGGGTGGCACTGGAGGAACCGGCACTGACGACGACACCTCGGCCCCAGA<br>CTCTAACGACCAGGA |     | 158 |
| Pep-F3-4           | AGGGACAACAATTCGTACAC                                                                                                                                                   | 247 | 20  |
| Pep-B3-4           | TACCGATTCCTCCTAGCAG                                                                                                                                                    | 520 | 19  |
| Pep-FIP(F1c+F2)-4  | CGTAAGCCTGAGATCCAAGAGCGCGACTCGTGTACCAATG                                                                                                                               |     | 40  |
| Pep-BIP(B1c+B2)-4  | AAGGGTGGCACTGGAGGATCCTGGTCGTTAGAGTCTG                                                                                                                                  |     | 37  |



|                    |                                                                                                                                                                                                   |     |     |
|--------------------|---------------------------------------------------------------------------------------------------------------------------------------------------------------------------------------------------|-----|-----|
| Pep-LoopF-4        | CGGGCACAATCACATTGAAG                                                                                                                                                                              | 373 | 20  |
| Pep-LoopB-4        | CACTGACGACGACACCTC                                                                                                                                                                                | 444 | 18  |
| Pep-F2-4           | GCGACTCGTGTACCAATG                                                                                                                                                                                | 326 | 18  |
| Pep-F1c-4          | CGTAAGCCTGAGATCCAAGAGC                                                                                                                                                                            | 406 | 22  |
| Pep-B2-4           | TCCTGGTCGTTAGAGTCTG                                                                                                                                                                               | 485 | 19  |
| Pep-B1c-4          | AAGGGTGGCACTGGAGGA                                                                                                                                                                                | 421 | 18  |
| Product            | GCGACTCGTGTACCAATGCCAAAGGTATCTTCAATGTGATTGTGCCCGCTTCGTCCAATGCTCTTGGATCTCA<br>GGCTTACGATGCGGTTCAAGCCAAGGGTGGCACTGGAGGAACCGGCACTGACGACGACACCTCGGCCCA<br>GACTCTAACGACCAGGA                           |     | 160 |
|                    |                                                                                                                                                                                                   |     |     |
| mPep-F3-1          | ACTGGTTCTCCTCGGTC                                                                                                                                                                                 | 146 | 17  |
| mPep-B3-1          | TACCGATTCCTCCTAGCAG                                                                                                                                                                               | 535 | 19  |
| mPep-FIP(F1c+F2)-1 | AGGCACAATCACATTGAAGATACCTGGACAACAATTCGTACACA                                                                                                                                                      |     | 44  |
| mPep-BIP(B1c+B2)-1 | CTCAGGCTTACGATGCGGTTTGTCTCGTTCAGTGC                                                                                                                                                               |     | 35  |
| mPep-LoopF-1       | TGGCATTGGTACACGAGTC                                                                                                                                                                               | 346 | 19  |
| mPep-LoopB-1       | AGGAGCAGGCACTGGA                                                                                                                                                                                  | 435 | 16  |
| mPep-F2-1          | GGACAACAATTCGTACACA                                                                                                                                                                               | 249 | 19  |
| mPep-F1c-1         | AGGCACAATCACATTGAAGATACCT                                                                                                                                                                         | 372 | 25  |
| mPep-B2-1          | TGTCGTCGTCAGTGC                                                                                                                                                                                   | 472 | 15  |
| mPep-B1c-1         | CTCAGGCTTACGATGCGGTT                                                                                                                                                                              | 395 | 20  |
| Product            | CGCTCAAGCCGCTTGAAAAGCATTTTCGAGCAACGTGCGCGACTCGTGTACCAATGCCAAAGGTATCTTC<br>AATGTGATTGTGCCTGCTTCGTCCAATGCTCTTGGATCTCAGGCTTACGATGCGGTTCAAGCCAAGGGTGG<br>CACCGGAGGAGCAGGCACTGGAGGAACCGGCACTGACGACGACA |     | 224 |
| <b>mPep-F3-2</b>   | GACTCGTGTACCAATGCC                                                                                                                                                                                | 328 | 18  |
| <b>mPep-B3-2</b>   | TACCGATTCCTCCTAGCAG                                                                                                                                                                               | 535 | 19  |

|                           |                                                                                                                   |     |     |
|---------------------------|-------------------------------------------------------------------------------------------------------------------|-----|-----|
| <b>mPep-FIP(F1c+F2)-2</b> | TGGCTTGAACCGCATCGTAATGCCTGCTTCGTCCA                                                                               |     | 35  |
| <b>mPep-BIP(B1c+B2)-2</b> | GTGGCACCGGAGGAGCTGTCGTCAGTGC                                                                                      |     | 31  |
| <b>mPep-LoopF-2</b>       | GCCTGAGATCCAAGAGCAT                                                                                               | 401 | 19  |
| <b>mPep-LoopB-2</b>       | GGCACTGGAGGAACCG                                                                                                  | 442 | 16  |
| <b>mPep-F2-2</b>          | TGCCTGCTTCGTCCA                                                                                                   | 368 | 15  |
| <b>mPep-F1c-2</b>         | TGGCTTGAACCGCATCGTAA                                                                                              | 421 | 20  |
| <b>mPep-B2-2</b>          | TGTCGTCGTCAGTGC                                                                                                   | 472 | 15  |
| <b>mPep-B1c-2</b>         | GTGGCACCGGAGGAGC                                                                                                  | 425 | 16  |
| Product                   | TGCCTGCTTCGTCCAATGCTCTTGGATCTCAGGCTTACGATGCGGTTCAAGCCAAGGGTGGCACCGGAGGA<br>GCAGGCACTGGAGGAACCGGCACTGACGACGACA     |     | 105 |
| mPep-F3-3                 | GCGACTCGTGTAACCAATG                                                                                               | 326 | 18  |
| mPep-B3-3                 | TACCGATTCCTCCTAGCAG                                                                                               | 535 | 19  |
| mPep-FIP(F1c+F2)-3        | TGGCTTGAACCGCATCGTAAATTGTGCCTGCTTCGTC                                                                             |     | 37  |
| mPep-BIP(B1c+B2)-3        | GTGGCACCGGAGGAGCTGTCGTCAGTGC                                                                                      |     | 31  |
| mPep-LoopF-3              | GCCTGAGATCCAAGAGCATT                                                                                              | 401 | 20  |
| mPep-LoopB-3              | GGCACTGGAGGAACCG                                                                                                  | 442 | 16  |
| mPep-F2-3                 | ATTGTGCCTGCTTCGTC                                                                                                 | 364 | 17  |
| mPep-F1c-3                | TGGCTTGAACCGCATCGTAA                                                                                              | 421 | 20  |
| mPep-B2-3                 | TGTCGTCGTCAGTGC                                                                                                   | 472 | 15  |
| mPep-B1c-3                | GTGGCACCGGAGGAGC                                                                                                  | 425 | 16  |
| Product                   | ATTGTGCCTGCTTCGTCCAATGCTCTTGGATCTCAGGCTTACGATGCGGTTCAAGCCAAGGGTGGCACCGG<br>AGGAGCAGGCACTGGAGGAACCGGCACTGACGACGACA |     | 109 |
| mPep-F3-4                 | GCGACTCGTGTAACCAAT                                                                                                | 326 | 17  |
| mPep-B3-4                 | TACCGATTCCTCCTAGCAG                                                                                               | 535 | 19  |
| mPep-FIP(F1c+F2)-4        | TGGCTTGAACCGCATCGTAAGATTGTGCCTGCTTCGT                                                                             |     | 37  |

|                    |                                                                                                                     |     |     |
|--------------------|---------------------------------------------------------------------------------------------------------------------|-----|-----|
| mPep-BIP(B1c+B2)-4 | GTGGCACCGGAGGAGCTGTCGTCGTCAGTGC                                                                                     |     | 31  |
| mPep-LoopF-4       | GCCTGAGATCCAAGAGCATT                                                                                                | 401 | 20  |
| mPep-LoopB-4       | GGCACTGGAGGAACCG                                                                                                    | 442 | 16  |
| mPep-F2-4          | GATTGTGCCTGCTTCGT                                                                                                   | 363 | 17  |
| mPep-F1c-4         | TGGCTTGAACCGCATCGTAA                                                                                                | 421 | 20  |
| mPep-B2-4          | TGTCGTCGTCAGTGC                                                                                                     | 472 | 15  |
| mPep-B1c-4         | GTGGCACCGGAGGAGC                                                                                                    | 425 | 16  |
| Product            | GATTGTGCCTGCTTCGTCCAATGCTCTTGGATCTCAGGCTTACGATGCGGTTCAAGCCAAGGGTGGCACCG<br>GAGGAGCAGGCACTGGAGGAACCGGCACTGACGACGACA  |     | 110 |
| mPep-F3-5          | GCGACTCGTGTAACAA                                                                                                    | 326 | 16  |
| mPep-B3-5          | TACCGATTCCTCCTAGCAG                                                                                                 | 535 | 19  |
| mPep-FIP(F1c+F2)-5 | TGGCTTGAACCGCATCGTAATGATTGTGCCTGCTTCG                                                                               |     | 37  |
| mPep-BIP(B1c+B2)-5 | GTGGCACCGGAGGAGCTGTCGTCGTCAGTGC                                                                                     |     | 31  |
| mPep-LoopF-5       | GCCTGAGATCCAAGAGCATT                                                                                                | 401 | 20  |
| mPep-LoopB-5       | GGCACTGGAGGAACCG                                                                                                    | 442 | 16  |
| mPep-F2-5          | TGATTGTGCCTGCTTCG                                                                                                   | 362 | 17  |
| mPep-F1c-5         | TGGCTTGAACCGCATCGTAA                                                                                                | 421 | 20  |
| mPep-B2-5          | TGTCGTCGTCAGTGC                                                                                                     | 472 | 15  |
| mPep-B1c-5         | GTGGCACCGGAGGAGC                                                                                                    | 425 | 16  |
| Product            | TGATTGTGCCTGCTTCGTCCAATGCTCTTGGATCTCAGGCTTACGATGCGGTTCAAGCCAAGGGTGGCACC<br>GGAGGAGCAGGCACTGGAGGAACCGGCACTGACGACGACA |     | 111 |
| mPep-F3-6          | GGACAACAATTCGTACACA                                                                                                 | 249 | 19  |
| mPep-B3-6          | TACCGATTCCTCCTAGCAG                                                                                                 | 535 | 19  |
| mPep-FIP(F1c+F2)-6 | AACCGCATCGTAAGCCTGAGGGTATCTTCAATGTGATTGTGC                                                                          |     | 42  |
| mPep-BIP(B1c+B2)-6 | GTGGCACCGGAGGAGCTGTCGTCGTCAGTGC                                                                                     |     | 31  |

|                    |                                                                                                                                                                                                                                                                                                                                                                                                                                           |     |     |
|--------------------|-------------------------------------------------------------------------------------------------------------------------------------------------------------------------------------------------------------------------------------------------------------------------------------------------------------------------------------------------------------------------------------------------------------------------------------------|-----|-----|
| mPep-LoopF-6       | AAGAGCATTGGACGAAGCA                                                                                                                                                                                                                                                                                                                                                                                                                       | 390 | 19  |
| mPep-LoopB-6       | GGCACTGGAGGAACCG                                                                                                                                                                                                                                                                                                                                                                                                                          | 442 | 16  |
| mPep-F2-6          | GGTATCTTCAATGTGATTGTGC                                                                                                                                                                                                                                                                                                                                                                                                                    | 349 | 22  |
| mPep-F1c-6         | AACCGCATCGTAAGCCTGAG                                                                                                                                                                                                                                                                                                                                                                                                                      | 414 | 20  |
| mPep-B2-6          | TGTCGTCGTCAGTGC                                                                                                                                                                                                                                                                                                                                                                                                                           | 472 | 15  |
| mPep-B1c-6         | GTGGCACCGGAGGAGC                                                                                                                                                                                                                                                                                                                                                                                                                          | 425 | 16  |
| Product            | GGTATCTTCAATGTGATTGTGCCTGCTTCGTCCAATGCTCTTGGATCTCAGGCTTACGATGCGGTTCAAGCC<br>AAGGGTGGCACCGGAGGAGCAGGCACTGGAGGAACCGGCACTGACGACGACA                                                                                                                                                                                                                                                                                                          |     | 124 |
| mPep-F3-7          | CAAGCCACGCTTCTCT                                                                                                                                                                                                                                                                                                                                                                                                                          | 19  | 16  |
| mPep-B3-7          | TACCGATTCCTCCTAGCAG                                                                                                                                                                                                                                                                                                                                                                                                                       | 535 | 19  |
| mPep-FIP(F1c+F2)-7 | CGCCGACTTCGACCGAGCGTCCATGCCGATGC                                                                                                                                                                                                                                                                                                                                                                                                          |     | 32  |
| mPep-BIP(B1c+B2)-7 | CTCAGGCTTACGATGCGGTTTGTGTCGTCAGTGC                                                                                                                                                                                                                                                                                                                                                                                                        |     | 35  |
| mPep-LoopF-7       | GGCAATGGTACCGCACC                                                                                                                                                                                                                                                                                                                                                                                                                         | 104 | 17  |
| mPep-LoopB-7       | AGGAGCAGGCACTGGA                                                                                                                                                                                                                                                                                                                                                                                                                          | 435 | 16  |
| mPep-F2-7          | CGTCCATGCCGATGC                                                                                                                                                                                                                                                                                                                                                                                                                           | 69  | 15  |
| mPep-F1c-7         | CGCCGACTTCGACCGAG                                                                                                                                                                                                                                                                                                                                                                                                                         | 172 | 17  |
| mPep-B2-7          | TGTCGTCGTCAGTGC                                                                                                                                                                                                                                                                                                                                                                                                                           | 472 | 15  |
| mPep-B1c-7         | CTCAGGCTTACGATGCGGTT                                                                                                                                                                                                                                                                                                                                                                                                                      | 395 | 20  |
| Product            | CGTCCATGCCGATGCTGCGGGTGGGTACCATTGCCGAATTTCAAGGTAGACCCGCAACCTCTGGCCAGC<br>ACGTTTTACTGGTTCTCCTCGGTGCGAAGTCGGCGTTTGCTACAACCCGCAAGCTCGCGTTGGCAGCACCAA<br>AGGCGCTCTTCACTGCACACACCAAGAAAACACTACGACAGGGACAACAATTCGTACACACTGCCGCAAACGT<br>GCGTGGCGCTCAAGCCGCTTGGAAAAGCATTTTCGAGCAACGTGCGGACTCGTGTACCAATGCCAAAGGT<br>ATCTTCAATGTGATTGTGCCTGCTTCGTCCAATGCTCTTGGATCTCAGGCTTACGATGCGGTTCAAGCCAAG<br>GGTGGCACCGGAGGAGCAGGCACTGGAGGAACCGGCACTGACGACGACA |     | 404 |

\* Primers name in bold type indicates the optimum RealAmp primer sets Pep-2 and mPep-2 that designed for *U. maydis* of Clade A and Clade B, respectively.

**Supplementary Table S2. Quantification of soil and maize plants samples by RealAmp assay using ZYD-S1 Soil Samples**

**Soil samples**

| Samples NO. | Field <sup>a</sup> | Tt         | spores g-1soil |          |          | LAMP products amplification | Sequencing analysis <sup>b</sup> | Growth on media <sup>c</sup> | PCR with Pok317/Pok318 | Sequencing analysis <sup>d</sup> |
|-------------|--------------------|------------|----------------|----------|----------|-----------------------------|----------------------------------|------------------------------|------------------------|----------------------------------|
|             |                    |            | Test 1         | Test 2   | Average  |                             |                                  |                              |                        |                                  |
| 1           | A1                 | 12.25±0.25 | 5.62E+04       | 9.45E+04 | 7.53E+04 | +                           | Clade A                          | +                            | +                      | Clade A                          |
| 2           | A1                 | 15±0       | 4.16E+03       | 4.16E+03 | 4.16E+03 | +                           | Clade A                          | +                            | +                      | Clade A                          |
| 3           | A1                 | 10.75±0.25 | 4.51E+05       | 2.68E+05 | 3.59E+05 | +                           | Clade A                          | +                            | +                      | Clade A                          |
| 4           | A1                 | 11.75±0.25 | 9.45E+04       | 1.59E+05 | 1.27E+05 | +                           | Clade A                          | +                            | +                      | Clade A                          |
| 5           | A1                 | 13±0       | 3.34E+04       | 3.34E+04 | 3.34E+04 | +                           | Clade A                          | +                            | +                      | Clade A                          |
| 6           | A2                 | 12.75±0.25 | 5.62E+04       | 3.34E+04 | 4.48E+04 | +                           | Clade A                          | +                            | +                      | Clade A                          |
| 7           | A2                 | 10.5±0     | 4.51E+05       | 4.51E+05 | 4.51E+05 | +                           | Clade A                          | +                            | +                      | Clade A                          |
| 8           | A2                 | 14.5±0     | 7.00E+03       | 7.00E+03 | 7.00E+03 | +                           | Clade A                          | +                            | +                      | Clade A                          |
| 9           | A2                 | 11.5±0.5   | 2.68E+05       | 9.45E+04 | 1.81E+05 | +                           | Clade A                          | +                            | +                      | Clade A                          |
| 10          | A2                 | 11.75±0.25 | 1.59E+05       | 9.45E+04 | 1.27E+05 | +                           | Clade A                          | +                            | +                      | Clade A                          |
| 11          | A3                 | 15.5±0.5   | 4.16E+03       | 1.47E+03 | 2.81E+03 | +                           | Clade A                          | +                            | +                      | Clade A                          |
| 12          | A3                 | 15.25±0.25 | 4.16E+03       | 2.47E+03 | 3.31E+03 | +                           | Clade A                          | +                            | +                      | Clade A                          |
| 13          | A3                 | 15±0       | 4.16E+03       | 4.16E+03 | 4.16E+03 | +                           | Clade A                          | +                            | +                      | Clade A                          |
| 14          | A3                 | 15.25±0.25 | 2.47E+03       | 4.16E+03 | 3.31E+03 | +                           | Clade A                          | +                            | +                      | Clade A                          |
| 15          | A3                 | 14.25±0.25 | 7.00E+03       | 1.18E+04 | 9.39E+03 | +                           | Clade A                          | +                            | +                      | Clade A                          |
| 16          | A4                 | 11.25±0.25 | 1.59E+05       | 2.68E+05 | 2.13E+05 | +                           | Clade A                          | +                            | +                      | Clade A                          |
| 17          | A4                 | 12.25±0.25 | 5.62E+04       | 9.45E+04 | 7.53E+04 | +                           | Clade A                          | +                            | +                      | Clade A                          |
| 18          | A4                 | 10.5±0     | 4.51E+05       | 4.51E+05 | 4.51E+05 | +                           | Clade A                          | +                            | +                      | Clade A                          |
| 19          | A4                 | 12.75±0.25 | 3.34E+04       | 5.62E+04 | 4.48E+04 | +                           | Clade A                          | +                            | +                      | Clade A                          |
| 20          | A4                 | NA         | -              | -        | -        | -                           | N/A                              | -                            | -                      | N/A                              |

|    |    |            |          |          |          |   |         |   |   |         |
|----|----|------------|----------|----------|----------|---|---------|---|---|---------|
| 21 | A5 | 12.75±0.25 | 3.34E+04 | 5.62E+04 | 4.48E+04 | + | Clade A | + | + | Clade A |
| 22 | A5 | 10.25±0.25 | 4.51E+05 | 7.59E+05 | 6.05E+05 | + | Clade A | + | + | Clade A |
| 23 | A5 | 9.25±0.25  | 1.28E+06 | 2.15E+06 | 1.71E+06 | + | Clade A | + | + | Clade A |
| 24 | A5 | 12.25±0.25 | 5.62E+04 | 9.45E+04 | 7.53E+04 | + | Clade A | + | + | Clade A |
| 25 | A5 | N/A        | -        | -        | -        | - | N/A     | - | - | N/A     |
| 26 | B1 | N/A        | -        | -        | -        | - | N/A     | - | - | N/A     |
| 27 | B1 | N/A        | -        | -        | -        | - | N/A     | - | - | N/A     |
| 28 | B1 | N/A        | -        | -        | -        | - | N/A     | - | - | N/A     |
| 29 | B1 | N/A        | -        | -        | -        | - | N/A     | - | - | N/A     |
| 30 | B1 | N/A        | -        | -        | -        | - | N/A     | - | - | N/A     |
| 31 | B2 | 13.25±0.25 | 1.98E+04 | 3.34E+04 | 2.66E+04 | + | Clade A | + | + | Clade A |
| 32 | B2 | 13.25±0.25 | 1.98E+04 | 3.34E+04 | 2.66E+04 | + | Clade A | + | + | Clade A |
| 33 | B2 | 7.5±0      | 1.03E+07 | 1.03E+07 | 1.03E+07 | + | Clade A | + | + | Clade A |
| 34 | B2 | 8.25±0.25  | 3.62E+06 | 6.09E+06 | 4.86E+06 | + | Clade A | + | + | Clade A |
| 35 | B2 | 14.5±0     | 7.00E+03 | 7.00E+03 | 7.00E+03 | + | Clade A | + | + | Clade A |
| 36 | B3 | 13.35±0.15 | 1.98E+04 | 2.71E+04 | 2.35E+04 | + | Clade A | + | + | Clade A |
| 37 | B3 | 10.5±0     | 4.51E+05 | 4.51E+05 | 4.51E+05 | + | Clade A | + | + | Clade A |
| 38 | B3 | N/A        | -        | -        | -        | - | N/A     | - | - | N/A     |
| 39 | B3 | 11.5±0     | 1.59E+05 | 1.59E+05 | 1.59E+05 | + | Clade A | + | + | Clade A |
| 40 | B3 | 12.5±0.5   | 9.45E+04 | 3.34E+04 | 6.39E+04 | + | Clade A | + | + | Clade A |
| 41 | B4 | 10.75±0.25 | 4.51E+05 | 2.68E+05 | 3.59E+05 | + | Clade A | + | + | Clade A |
| 42 | B4 | 10.75±0.25 | 2.68E+05 | 4.51E+05 | 3.59E+05 | + | Clade A | + | + | Clade A |
| 43 | B4 | 14.75±0.25 | 7.00E+03 | 4.16E+03 | 5.58E+03 | + | Clade A | + | + | Clade A |
| 44 | B4 | 14.75±0.25 | 7.00E+03 | 4.16E+03 | 5.58E+03 | + | Clade A | + | + | Clade A |
| 45 | B4 | 13.75±0.25 | 1.98E+04 | 1.18E+04 | 1.58E+04 | + | Clade A | + | + | Clade A |

|    |    |            |          |          |          |   |         |   |   |         |
|----|----|------------|----------|----------|----------|---|---------|---|---|---------|
| 46 | B5 | 8.75±0.25  | 2.15E+06 | 3.62E+06 | 2.88E+06 | + | Clade A | + | + | Clade A |
| 47 | B5 | 12.25±0.25 | 9.45E+04 | 5.62E+04 | 7.53E+04 | + | Clade A | + | + | Clade A |
| 48 | B5 | 8.75±0.25  | 3.62E+06 | 2.15E+06 | 2.88E+06 | + | Clade A | + | + | Clade A |
| 49 | B5 | 10.5±0     | 4.51E+05 | 4.51E+05 | 4.51E+05 | + | Clade A | + | + | Clade A |
| 50 | B5 | N/A        | -        | -        | -        | - | N/A     | - | - | N/A     |
| 51 | C1 | 13.75±0.25 | 1.98E+04 | 1.18E+04 | 1.58E+04 | + | Clade A | + | + | Clade A |
| 52 | C1 | 13.5±0     | 1.98E+04 | 1.98E+04 | 1.98E+04 | + | Clade A | + | + | Clade A |
| 53 | C1 | 12.25±0.25 | 5.62E+04 | 9.45E+04 | 7.53E+04 | + | Clade A | + | + | Clade A |
| 54 | C1 | N/A        | -        | -        | -        | - | N/A     | - | - | N/A     |
| 55 | C1 | 14.75±0.25 | 7.00E+03 | 4.16E+03 | 5.58E+03 | + | Clade A | + | + | Clade A |
| 56 | C2 | 10.75±0.25 | 4.51E+05 | 2.68E+05 | 3.59E+05 | + | Clade A | + | + | Clade A |
| 57 | C2 | 10±0       | 7.59E+05 | 7.59E+05 | 7.59E+05 | + | Clade A | + | + | Clade A |
| 58 | C2 | 13.25±0.25 | 1.98E+04 | 3.34E+04 | 2.66E+04 | + | Clade A | + | + | Clade A |
| 59 | C2 | 10±0.5     | 1.28E+06 | 4.51E+05 | 8.64E+05 | + | Clade A | + | + | Clade A |
| 60 | C2 | 13.25±0.25 | 1.98E+04 | 3.34E+04 | 2.66E+04 | + | Clade A | + | + | Clade A |
| 61 | C3 | N/A        | -        | -        | -        | - | N/A     | - | - | N/A     |
| 62 | C3 | 12.25±0.25 | 5.62E+04 | 9.45E+04 | 7.53E+04 | + | Clade A | + | + | Clade A |
| 63 | C3 | 15.25±0.25 | 4.16E+03 | 2.47E+03 | 3.31E+03 | + | Clade A | + | + | Clade A |
| 64 | C3 | 13.25±0.25 | 1.98E+04 | 3.34E+04 | 2.66E+04 | + | Clade A | + | + | Clade A |
| 65 | C3 | 15.75±0.25 | 2.47E+03 | 1.47E+03 | 1.97E+03 | + | Clade A | + | + | Clade A |
| 66 | C4 | N/A        | -        | -        | -        | - | N/A     | - | - | N/A     |
| 67 | C4 | N/A        | -        | -        | -        | - | N/A     | - | - | N/A     |
| 68 | C4 | 15±0.5     | 7.00E+03 | 2.47E+03 | 4.73E+03 | + | Clade A | + | + | Clade A |
| 69 | C4 | 16±0.5     | 2.47E+03 | 8.72E+02 | 1.67E+03 | + | Clade A | + | + | Clade A |
| 70 | C4 | 11±0.5     | 4.51E+05 | 1.59E+05 | 3.05E+05 | + | Clade A | + | + | Clade A |

|    |    |            |          |          |          |   |         |   |   |         |
|----|----|------------|----------|----------|----------|---|---------|---|---|---------|
| 71 | C5 | N/A        | -        | -        | -        | - | N/A     | - | - | N/A     |
| 72 | C5 | 11.75±0.25 | 1.59E+05 | 9.45E+04 | 1.27E+05 | + | Clade A | + | + | Clade A |
| 73 | C5 | 9±0.5      | 3.62E+06 | 1.28E+06 | 2.45E+06 | + | Clade A | + | + | Clade A |
| 74 | C5 | 11.75±0.25 | 1.59E+05 | 9.45E+04 | 1.27E+05 | + | Clade A | + | + | Clade A |
| 75 | C5 | 12.5±0.5   | 9.45E+04 | 3.34E+04 | 6.39E+04 | + | Clade A | + | + | Clade A |
| 76 | D1 | N/A        | -        | -        | -        | - | N/A     | - | - | N/A     |
| 77 | D1 | N/A        | -        | -        | -        | - | N/A     | - | - | N/A     |
| 78 | D1 | N/A        | -        | -        | -        | - | N/A     | - | - | N/A     |
| 79 | D1 | N/A        | -        | -        | -        | - | N/A     | - | - | N/A     |
| 80 | D1 | N/A        | -        | -        | -        | - | N/A     | - | - | N/A     |
| 81 | D2 | 13.75±0.25 | 1.98E+04 | 1.18E+04 | 1.58E+04 | + | Clade A | + | + | Clade A |
| 82 | D2 | 12.75±0.25 | 5.62E+04 | 3.34E+04 | 4.48E+04 | + | Clade A | + | + | Clade A |
| 83 | D2 | 14.5±0.5   | 1.18E+04 | 4.16E+03 | 7.97E+03 | + | Clade A | + | + | Clade A |
| 84 | D2 | 13.75±0.25 | 1.18E+04 | 1.98E+04 | 1.58E+04 | + | Clade A | + | + | Clade A |
| 85 | D2 | 13.5±0.5   | 3.34E+04 | 1.18E+04 | 2.26E+04 | + | Clade A | + | + | Clade A |
| 86 | D3 | N/A        | -        | -        | -        | - | N/A     | - | - | N/A     |
| 87 | D3 | N/A        | -        | -        | -        | - | N/A     | - | - | N/A     |
| 88 | D3 | 12.25±0.25 | 5.62E+04 | 9.45E+04 | 7.53E+04 | + | Clade A | + | + | Clade A |
| 89 | D3 | 14±0.5     | 7.00E+03 | 1.98E+04 | 1.34E+04 | + | Clade A | + | + | Clade A |
| 90 | D3 | 12.25±0.25 | 5.62E+04 | 9.45E+04 | 7.53E+04 | + | Clade A | + | + | Clade A |
| 91 | D4 | 11.25±0.25 | 1.59E+05 | 2.68E+05 | 2.13E+05 | + | Clade A | + | + | Clade A |
| 92 | D4 | 13±0.5     | 5.62E+04 | 1.98E+04 | 3.80E+04 | + | Clade A | + | + | Clade A |
| 93 | D4 | 10.5±0.5   | 7.59E+05 | 2.68E+05 | 5.13E+05 | + | Clade A | + | + | Clade A |
| 94 | D4 | 10±0.5     | 1.28E+06 | 4.51E+05 | 8.64E+05 | + | Clade A | + | + | Clade A |
| 95 | D4 | 12±0.5     | 1.59E+05 | 5.62E+04 | 1.08E+05 | + | Clade A | + | + | Clade A |



|     |    |             |          |          |          |   |         |   |   |         |
|-----|----|-------------|----------|----------|----------|---|---------|---|---|---------|
| 96  | D5 | 11.5±0.5    | 2.68E+05 | 9.45E+04 | 1.81E+05 | + | Clade A | + | + | Clade A |
| 97  | D5 | 12.5±0.5    | 9.45E+04 | 3.34E+04 | 6.39E+04 | + | Clade A | + | + | Clade A |
| 98  | D5 | 14.5±0.5    | 1.18E+04 | 4.16E+03 | 7.97E+03 | + | Clade A | + | + | Clade A |
| 99  | D5 | 10.75±0.25  | 2.68E+05 | 4.51E+05 | 3.59E+05 | + | Clade A | + | + | Clade A |
| 100 | D5 | 12.5±0.5    | 9.45E+04 | 3.34E+04 | 6.39E+04 | + | Clade A | + | + | Clade A |
| 101 | E1 | 11.75±0.25  | 1.59E+05 | 9.45E+04 | 1.27E+05 | + | Clade B | + | + | Clade B |
| 102 | E1 | 10.5±0      | 4.51E+05 | 4.51E+05 | 4.51E+05 | + | Clade B | + | + | Clade B |
| 103 | E1 | 12.75±0.25  | 5.62E+04 | 3.34E+04 | 4.48E+04 | + | Clade B | + | + | Clade B |
| 104 | E1 | 10.35±0.35  | 7.59E+05 | 3.66E+05 | 5.62E+05 | + | Clade B | + | + | Clade B |
| 105 | E1 | 9.75±0.25   | 1.28E+06 | 7.59E+05 | 1.02E+06 | + | Clade B | + | + | Clade B |
| 106 | E2 | 14.75±0.25  | 7.00E+03 | 4.16E+03 | 5.58E+03 | + | Clade B | + | + | Clade B |
| 107 | E2 | 84.25±69.75 | 7.00E+03 | 5.64E-60 | 3.50E+03 | + | Clade B | + | + | Clade B |
| 108 | E2 | 12.25±0.25  | 5.62E+04 | 9.45E+04 | 7.53E+04 | + | Clade B | + | + | Clade B |
| 109 | E2 | 15.75±0.25  | 2.47E+03 | 1.47E+03 | 1.97E+03 | + | Clade B | + | + | Clade B |
| 110 | E2 | 14.25±0.25  | 7.00E+03 | 1.18E+04 | 9.39E+03 | + | Clade B | + | + | Clade B |
| 111 | E3 | 13.75±0.25  | 1.98E+04 | 1.18E+04 | 1.58E+04 | + | Clade B | + | + | Clade B |
| 112 | E3 | 10.25±0.25  | 4.51E+05 | 7.59E+05 | 6.05E+05 | + | Clade B | + | + | Clade B |
| 113 | E3 | 10±0        | 7.59E+05 | 7.59E+05 | 7.59E+05 | + | Clade B | + | + | Clade B |
| 114 | E3 | 9.25±0.25   | 2.15E+06 | 1.28E+06 | 1.71E+06 | + | Clade B | + | + | Clade B |
| 115 | E3 | 11±0.5      | 1.59E+05 | 4.51E+05 | 3.05E+05 | + | Clade B | + | + | Clade B |
| 116 | E4 | 12±0.5      | 1.59E+05 | 5.62E+04 | 1.08E+05 | + | Clade B | + | + | Clade B |
| 117 | E4 | 8.5±0       | 3.62E+06 | 3.62E+06 | 3.62E+06 | + | Clade B | + | + | Clade B |
| 118 | E4 | 7.75±0.25   | 1.03E+07 | 6.09E+06 | 8.17E+06 | + | Clade B | + | + | Clade B |
| 119 | E4 | 12.25±0.25  | 5.62E+04 | 9.45E+04 | 7.53E+04 | + | Clade B | + | + | Clade B |
| 120 | E4 | 10.25±0.25  | 4.51E+05 | 7.59E+05 | 6.05E+05 | + | Clade B | + | + | Clade B |

|     |    |            |          |          |          |   |         |   |   |         |
|-----|----|------------|----------|----------|----------|---|---------|---|---|---------|
| 121 | E5 | 12±0       | 9.45E+04 | 9.45E+04 | 9.45E+04 | + | Clade B | + | + | Clade B |
| 122 | E5 | 11±0       | 2.68E+05 | 2.68E+05 | 2.68E+05 | + | Clade B | + | + | Clade B |
| 123 | E5 | 10.5±0     | 4.51E+05 | 4.51E+05 | 4.51E+05 | + | Clade B | + | + | Clade B |
| 124 | E5 | 12.25±0.25 | 5.62E+04 | 9.45E+04 | 7.53E+04 | + | Clade B | + | + | Clade B |
| 125 | E5 | 12±0       | 9.45E+04 | 9.45E+04 | 9.45E+04 | + | Clade B | + | + | Clade B |
| 126 | F1 | 14.25±0.25 | 7.00E+03 | 1.18E+04 | 9.39E+03 | + | Clade A | + | + | Clade A |
| 127 | F1 | 8.75±0.25  | 2.15E+06 | 3.62E+06 | 2.88E+06 | + | Clade A | + | + | Clade A |
| 128 | F1 | 11.5±0     | 1.59E+05 | 1.59E+05 | 1.59E+05 | + | Clade A | + | + | Clade A |
| 129 | F1 | 12±0       | 9.45E+04 | 9.45E+04 | 9.45E+04 | + | Clade A | + | + | Clade A |
| 130 | F1 | 14.75±0.25 | 7.00E+03 | 4.16E+03 | 5.58E+03 | + | Clade A | + | + | Clade A |
| 131 | F2 | 9.5±0.5    | 2.15E+06 | 7.59E+05 | 1.45E+06 | + | Clade A | + | + | Clade A |
| 132 | F2 | 10.75±0.25 | 4.51E+05 | 2.68E+05 | 3.59E+05 | + | Clade A | + | + | Clade A |
| 133 | F2 | 9.25±0.25  | 1.28E+06 | 2.15E+06 | 1.71E+06 | + | Clade A | + | + | Clade A |
| 134 | F2 | 11.75±0.25 | 1.59E+05 | 9.45E+04 | 1.27E+05 | + | Clade A | + | + | Clade A |
| 135 | F2 | 12.25±0.25 | 5.62E+04 | 9.45E+04 | 7.53E+04 | + | Clade A | + | + | Clade A |
| 136 | F3 | 11±0       | 2.68E+05 | 2.68E+05 | 2.68E+05 | + | Clade A | + | + | Clade A |
| 137 | F3 | 12±0       | 9.45E+04 | 9.45E+04 | 9.45E+04 | + | Clade A | + | + | Clade A |
| 138 | F3 | 11.75±0.25 | 1.59E+05 | 9.45E+04 | 1.27E+05 | + | Clade A | + | + | Clade A |
| 139 | F3 | 9.5±0      | 1.28E+06 | 1.28E+06 | 1.28E+06 | + | Clade A | + | + | Clade A |
| 140 | F3 | 17.5±0     | 3.08E+02 | 3.08E+02 | 3.08E+02 | + | Clade A | + | + | Clade A |
| 141 | F4 | 13.75±0.25 | 1.18E+04 | 1.98E+04 | 1.58E+04 | + | Clade A | + | + | Clade A |
| 142 | F4 | 12.75±0.25 | 5.62E+04 | 3.34E+04 | 4.48E+04 | + | Clade A | + | + | Clade A |
| 143 | F4 | 11.25±0.25 | 1.59E+05 | 2.68E+05 | 2.13E+05 | + | Clade A | + | + | Clade A |
| 144 | F4 | 13±0.5     | 5.62E+04 | 1.98E+04 | 3.80E+04 | + | Clade A | + | + | Clade A |
| 145 | F4 | 10.5±0.5   | 7.59E+05 | 2.68E+05 | 5.13E+05 | + | Clade A | + | + | Clade A |

|     |    |            |          |          |          |   |         |   |   |         |
|-----|----|------------|----------|----------|----------|---|---------|---|---|---------|
| 146 | F5 | 10.5±0     | 4.51E+05 | 4.51E+05 | 4.51E+05 | + | Clade A | + | + | Clade A |
| 147 | F5 | 11.25±0.25 | 1.59E+05 | 2.68E+05 | 2.13E+05 | + | Clade A | + | + | Clade A |
| 148 | F5 | 11.75±0.25 | 1.59E+05 | 9.45E+04 | 1.27E+05 | + | Clade A | + | + | Clade A |
| 149 | F5 | 13±0       | 3.34E+04 | 3.34E+04 | 3.34E+04 | + | Clade A | + | + | Clade A |
| 150 | F5 | 14.25±0.25 | 1.18E+04 | 7.00E+03 | 9.39E+03 | + | Clade A | + | + | Clade A |

N/A, not determined.

+, positive result.

-, negative result.

a Filed location.

b Analysis of the sequencing of the LAMP products that amplified with primer sets F2-2/B2-2 or mF2-2/mB2-2.

c Growth on the PDA and YEPS<sub>L</sub>.

d Analysis of the sequencing of the PCR products that amplified with primers Pok317/Pok318<sup>31</sup>.

A, Qiliying town, Xinxiang County, Henan Province

B, Duliang town, Kaifeng City, Henan Province

C, Pohu town, Xuchang City, Henan Province

D, Wucheng town, Wuyang County, Henan Province

E, Baima town, Nanjing, Jiangsu Province

F, Zhengfu town, Fuyang City, Anhui Province

## Maize plants samples

| Samples NO. | Sample name <sup>a</sup> | Tt         | U. maydis (ng/μL) |           |           | LAMP products amplification | Sequencing analysis <sup>b</sup> | Growth on media <sup>c</sup> | PCR with Pok317/Pok318 | sequencing analysis <sup>d</sup> |
|-------------|--------------------------|------------|-------------------|-----------|-----------|-----------------------------|----------------------------------|------------------------------|------------------------|----------------------------------|
|             |                          |            | Test 1            | Test 2    | Average   |                             |                                  |                              |                        |                                  |
| 1           | A-1                      | 22±0       | 0.248995          | 0.248995  | 0.248995  | +                           | Clade A                          | +                            | +                      | Clade A                          |
| 2           | A-2                      | 18±0.5     | 1.3130764         | 1.0766139 | 1.1948451 | +                           | Clade A                          | +                            | +                      | Clade A                          |
| 3           | A-3                      | 18.5±0     | 1.0766139         | 1.0766139 | 1.0766139 | +                           | Clade A                          | +                            | +                      | Clade A                          |
| 4           | A-4                      | 22.5±0.5   | 0.248995          | 0.0125325 | 0.1307638 | +                           | Clade A                          | +                            | +                      | Clade A                          |
| 5           | A-5                      | 20±0.5     | 0.8401513         | 0.6036888 | 0.7219201 | +                           | Clade A                          | +                            | +                      | Clade A                          |
| 6           | A-6                      | 22.75±0.25 | 0.1307638         | 0.0125325 | 0.0716481 | +                           | Clade A                          | +                            | +                      | Clade A                          |
| 7           | A-7                      | 22.5±0.5   | 0.0125325         | 0.248995  | 0.1307638 | +                           | Clade A                          | +                            | +                      | Clade A                          |
| 8           | A-8                      | 17.25±0.25 | 1.3130764         | 1.4313076 | 1.372192  | +                           | Clade A                          | +                            | +                      | Clade A                          |
| 9           | A-9                      | 22.5±0.5   | 0.0125325         | 0.248995  | 0.1307638 | +                           | Clade A                          | +                            | +                      | Clade A                          |
| 10          | B1-1                     | 22±0.5     | 0.1307638         | 0.3672263 | 0.248995  | +                           | Clade A                          | +                            | +                      | Clade A                          |
| 11          | B1-2                     | 21±0.5     | 0.6036888         | 0.3672263 | 0.4854576 | +                           | Clade A                          | +                            | +                      | Clade A                          |
| 12          | B1-3                     | 22.75±0.25 | 0.0125325         | 0.1307638 | 0.0716481 | +                           | Clade A                          | +                            | +                      | Clade A                          |
| 13          | B1-4                     | 17±0       | 1.4313076         | 1.4313076 | 1.4313076 | +                           | Clade A                          | +                            | +                      | Clade A                          |
| 14          | B1-5                     | 15.5±0.5   | 1.9042327         | 1.6677702 | 1.7860014 | +                           | Clade A                          | +                            | +                      | Clade A                          |
| 15          | B1-6                     | 11.75±0.25 | 2.7318515         | 2.6136202 | 2.6727359 | +                           | Clade A                          | +                            | +                      | Clade A                          |
| 16          | B1-7                     | 13.25±0.25 | 2.3771577         | 2.2589265 | 2.3180421 | +                           | Clade A                          | +                            | +                      | Clade A                          |
| 17          | B1-8                     | 19±0       | 0.9583826         | 0.9583826 | 0.9583826 | +                           | Clade A                          | +                            | +                      | Clade A                          |
| 18          | B1-9                     | 18.25±0.25 | 1.1948451         | 1.0766139 | 1.1357295 | +                           | Clade A                          | +                            | +                      | Clade A                          |
| 19          | B2-1                     | 18.75±0.25 | 0.9583826         | 1.0766139 | 1.0174982 | +                           | Clade A                          | +                            | +                      | Clade A                          |
| 20          | B2-2                     | 16.75±0.25 | 1.5495389         | 1.4313076 | 1.4904233 | +                           | Clade A                          | +                            | +                      | Clade A                          |

|    |      |            |           |           |           |   |         |   |   |         |
|----|------|------------|-----------|-----------|-----------|---|---------|---|---|---------|
| 21 | B2-3 | 17±0.5     | 1.3130764 | 1.5495389 | 1.4313076 | + | Clade A | + | + | Clade A |
| 22 | B2-4 | 13.75±0.25 | 2.2589265 | 2.1406952 | 2.1998108 | + | Clade A | + | + | Clade A |
| 23 | B2-5 | 18±0.5     | 1.0766139 | 1.3130764 | 1.1948451 | + | Clade A | + | + | Clade A |
| 24 | B2-6 | 15.25±0.25 | 1.7860014 | 1.9042327 | 1.845117  | + | Clade A | + | + | Clade A |
| 25 | B2-7 | 18.5±0     | 1.0766139 | 1.0766139 | 1.0766139 | + | Clade A | + | + | Clade A |
| 26 | B2-8 | 13.25±0.25 | 2.2589265 | 2.3771577 | 2.3180421 | + | Clade A | + | + | Clade A |
| 27 | B2-9 | 20.25±0.25 | 0.6036888 | 0.7219201 | 0.6628044 | + | Clade A | + | + | Clade A |
| 28 | C-1  | 22.25±0.25 | 0.248995  | 0.1307638 | 0.1898794 | + | Clade A | + | + | Clade A |
| 29 | C-2  | 21.5±0.5   | 0.248995  | 0.4854576 | 0.3672263 | + | Clade A | + | + | Clade A |
| 30 | C-3  | 22.75±0.25 | 0.0125325 | 0.1307638 | 0.0716481 | + | Clade A | + | + | Clade A |
| 31 | C-4  | 23±0       | 0.0125325 | 0.0125325 | 0.0125325 | + | Clade A | + | + | Clade A |
| 32 | C-5  | 22.5±0.5   | 0.248995  | 0.0125325 | 0.1307638 | + | Clade A | + | + | Clade A |
| 33 | C-6  | 16.25±0.25 | 1.6677702 | 1.5495389 | 1.6086545 | + | Clade A | + | + | Clade A |
| 34 | C-7  | 18.5±0.5   | 1.1948451 | 0.9583826 | 1.0766139 | + | Clade A | + | + | Clade A |
| 35 | C-8  | 20.25±0.25 | 0.7219201 | 0.6036888 | 0.6628044 | + | Clade A | + | + | Clade A |
| 36 | C-9  | 16.25±0.25 | 1.5495389 | 1.6677702 | 1.6086545 | + | Clade A | + | + | Clade A |
| 37 | D-1  | 20.5±0     | 0.6036888 | 0.6036888 | 0.6036888 | + | Clade A | + | + | Clade A |
| 38 | D-2  | 22±0.5     | 0.1307638 | 0.3672263 | 0.248995  | + | Clade A | + | + | Clade A |
| 39 | D-3  | 22.75±0.25 | 0.1307638 | 0.0125325 | 0.0716481 | + | Clade A | + | + | Clade A |
| 40 | D-4  | 20.5±0.5   | 0.7219201 | 0.4854576 | 0.6036888 | + | Clade A | + | + | Clade A |
| 41 | D-5  | 21±0.5     | 0.3672263 | 0.6036888 | 0.4854576 | + | Clade A | + | + | Clade A |
| 42 | D-6  | 14.5±0.5   | 2.1406952 | 1.9042327 | 2.0224639 | + | Clade A | + | + | Clade A |
| 43 | D-7  | 14.25±0.25 | 2.1406952 | 2.0224639 | 2.0815796 | + | Clade A | + | + | Clade A |
| 44 | D-8  | 14±0.5     | 2.2589265 | 2.0224639 | 2.1406952 | + | Clade A | + | + | Clade A |
| 45 | D-9  | 19.5±0     | 0.8401513 | 0.8401513 | 0.8401513 | + | Clade A | + | + | Clade A |

|    |     |            |           |           |           |   |         |   |   |         |
|----|-----|------------|-----------|-----------|-----------|---|---------|---|---|---------|
| 46 | M-1 | N/A        | -         | -         | -         | - | N/A     | - | - | N/A     |
| 47 | M-2 | N/A        | -         | -         | -         | - | N/A     | - | - | N/A     |
| 48 | M-3 | 20.25±0.25 | 0.7219201 | 0.6036888 | 0.6628044 | + | Clade A | + | + | Clade A |
| 49 | M-4 | 18.5±0     | 1.0766139 | 1.0766139 | 1.0766139 | + | Clade A | + | + | Clade A |
| 50 | M-5 | 22.5±0.5   | 0.0125325 | 0.248995  | 0.1307638 | + | Clade A | + | + | Clade A |
| 51 | M-6 | 20.75±0.25 | 0.6036888 | 0.4854576 | 0.5445732 | + | Clade A | + | + | Clade A |
| 52 | M-7 | 16.25±0.25 | 1.5495389 | 1.6677702 | 1.6086545 | + | Clade A | + | + | Clade A |
| 53 | M-8 | 15.5±0     | 1.7860014 | 1.7860014 | 1.7860014 | + | Clade A | + | + | Clade A |
| 54 | M-9 | 15±0.5     | 2.0224639 | 1.7860014 | 1.9042327 | + | Clade A | + | + | Clade A |
| 55 | S-1 | N/A        | -         | -         | -         | - | N/A     | - | - | N/A     |
| 56 | S-2 | N/A        | -         | -         | -         | - | N/A     | - | - | N/A     |
| 57 | S-3 | N/A        | -         | -         | -         | - | N/A     | - | - | N/A     |
| 58 | S-4 | N/A        | -         | -         | -         | - | N/A     | - | - | N/A     |
| 59 | S-5 | N/A        | -         | -         | -         | - | N/A     | - | - | N/A     |
| 60 | S-6 | N/A        | -         | -         | -         | - | N/A     | - | - | N/A     |
| 61 | S-7 | N/A        | -         | -         | -         | - | N/A     | - | - | N/A     |
| 62 | S-8 | N/A        | -         | -         | -         | - | N/A     | - | - | N/A     |
| 63 | S-9 | N/A        | -         | -         | -         | - | N/A     | - | - | N/A     |
| 64 | Z-1 | 22.25±0.25 | 0.1307638 | 0.248995  | 0.1898794 | + | Clade A | + | + | Clade A |
| 65 | Z-2 | 17.75±0.25 | 1.3130764 | 1.1948451 | 1.2539607 | + | Clade A | + | + | Clade A |
| 66 | Z-3 | 19.25±0.25 | 0.8401513 | 0.9583826 | 0.899267  | + | Clade A | + | + | Clade A |
| 67 | Z-4 | 18.75±0.25 | 1.0766139 | 0.9583826 | 1.0174982 | + | Clade A | + | + | Clade A |
| 68 | Z-5 | 20.75±0.25 | 0.6036888 | 0.4854576 | 0.5445732 | + | Clade A | + | + | Clade A |
| 69 | Z-6 | 18±0       | 1.1948451 | 1.1948451 | 1.1948451 | + | Clade A | + | + | Clade A |
| 70 | Z-7 | 16.5±0.5   | 1.4313076 | 1.6677702 | 1.5495389 | + | Clade A | + | + | Clade A |

|    |     |            |           |           |           |   |         |   |   |         |
|----|-----|------------|-----------|-----------|-----------|---|---------|---|---|---------|
| 71 | Z-8 | 15±0.5     | 2.0224639 | 1.7860014 | 1.9042327 | + | Clade A | + | + | Clade A |
| 72 | Z-9 | 21.25±0.25 | 0.3672263 | 0.4854576 | 0.4263419 | + | Clade A | + | + | Clade A |

N/A, not determined.

+, positive result.

-, negative result.

a Genotypes of maize plants samples.

b Analysis of the sequencing of the LAMP products that amplified with primer sets F2-2/B2-2 or mF2-2/mB2-2.

c Growth on the PDA and YEPS<sub>L</sub>.

d Analysis of the sequencing of the PCR products that amplified with primers Pok317/Pok318<sup>31</sup>.

A, A801.

B1, B73.

B2, B104.

C, Chang7-2.

D, Dan340.

M, Mo17.

S, Shen137.

Z, Zheng58.
