# Supplementary material for: Development of a real-time fluorescence loop-mediated isothermal amplification assay for rapid and quantitative detection of Ustilago maydis
Source: PubMed Central journal article supplement (PMC5645423; doi:10.1038/s41598-017-13881-4), 2017-10-17
Supplement: 41598_2017_13881_MOESM2_ESM.pdf [file 41598_2017_13881_MOESM2_ESM.pdf]

**TITLE:**

Development of a real-time fluorescence loop-mediated isothermal amplification assay for rapid and quantitative detection of *Ustilago maydis*

**AUTHORS:**

Yanyong Cao<sup>1, +</sup>, Lifeng Wang<sup>1, +</sup>, Liping Duan<sup>2</sup>, Jingjing Li<sup>1</sup>, Juan Ma<sup>1</sup>, Shuna Xie<sup>3</sup>, Lei Shi<sup>2</sup> & Huiyong Li<sup>1</sup>

**AFFILIATION:**

<sup>1</sup> Institute of Cereal Crops, Henan Academy of Agricultural Sciences, Zhengzhou, 450002, China

<sup>2</sup> Institute of Food Safety and Nutrition, Jinan University, Guangzhou, 510632, China

<sup>3</sup> Institute of Plant Protection, Henan Academy of Agricultural Sciences, Zhengzhou, 450002, China

Correspondence and requests for materials should be addressed to Y.C. (email: [yanyongcao@126.com](mailto:yanyongcao@126.com)) or H.L. (email: [lihuiyong1977@126.com](mailto:lihuiyong1977@126.com))

+These authors contribute equally to this work.

**Supplementary Table S1. The screening of different sets of primers used for *Ustilago maydis* real-time fluorescence loop-mediated isothermal amplification**

| Name*             | Primer sequences (5' to 3')                                                                                                                                            | Position | Length |
|-------------------|------------------------------------------------------------------------------------------------------------------------------------------------------------------------|----------|--------|
| See-F3-1          | GCCATCAACAAGAATTCGC                                                                                                                                                    | 265      | 19     |
| See-B3-1          | TCGGCCCAAATTTATACTCTC                                                                                                                                                  | 466      | 21     |
| See-FIP(F1c+F2)-1 | CTGCCTGTCGTACGTGAACTCCACGGAGGACTACATAGACT                                                                                                                              |          | 41     |
| See-BIP(B1c+B2)-1 | CTCGTACAGGTATGGCGATAGCCAGAAGCAGACTGGTGATC                                                                                                                              |          | 41     |
| See-LoopF-1       | CCTTCTCCTTGACCTGAG                                                                                                                                                     | 332      | 19     |
| See-LoopB-1       | AAGCGGAGTATTCTGTTGCT                                                                                                                                                   | 407      | 20     |
| See-F2-1          | CACGGAGGACTACATAGACT                                                                                                                                                   | 289      | 20     |
| See-F1c-1         | CTGCCTGTCGTACGTGAACTC                                                                                                                                                  | 354      | 21     |
| See-B2-1          | CAGAAGCAGACTGGTGATC                                                                                                                                                    | 445      | 19     |
| See-B1c-1         | CTCGTACAGGTATGGCGATAGC                                                                                                                                                 | 369      | 22     |
| Product           | CACGGAGGACTACATAGACTTCCGGCTCAGGTGCAAGGAGAAGGCGAGTTTCACGTACGACAGGCAGAGAA<br>ATGCAGTCGGCTCGTACAGGTATGGCGATAGCCATGGTAACAGTAGGGAAGCGGAGTATTCTGTTGCTGATC<br>ACCAGTCTGCTTCTG |          | 157    |
| See-F3-2          | CTTACCACCTTCGTTTCA                                                                                                                                                     | 6        | 19     |
| See-B3-2          | CGCTCGTGAATCTGTTCA                                                                                                                                                     | 224      | 18     |
| See-FIP(F1c+F2)-2 | CAATGGCAGAGGACGAACGACTCCTCGTCATACTCTGTCT                                                                                                                               |          | 40     |
| See-BIP(B1c+B2)-2 | GCAAGCAGAAGCACAAAGATCAAGCTCGATGCTGTCTTCAG                                                                                                                              |          | 40     |
| See-LoopF-2       | GTAGAGGATGAGCAGACACG                                                                                                                                                   | 73       | 20     |
| See-LoopB-2       | GCAATTTGAAGAGGAGATCGC                                                                                                                                                  | 129      | 21     |
| See-F2-2          | CTCCTCGTCATACTCTGTCT                                                                                                                                                   | 28       | 20     |
| See-F1c-2         | CAATGGCAGAGGACGAACGA                                                                                                                                                   | 100      | 20     |
| See-B2-2          | GCTCGATGCTGTCTTCAG                                                                                                                                                     | 175      | 18     |

|                   |                                                                                                                                                                      |     |     |
|-------------------|----------------------------------------------------------------------------------------------------------------------------------------------------------------------|-----|-----|
| See-B1c-2         | GCAAGCAGAAGCACAAGATCAA                                                                                                                                               | 101 | 22  |
| Product           | CTCCTCGTCATACTCTGTCTTGCCACGTGTCTGCTCATCCTCTACAATCGTTTCGTTTCGCTCTGCCATTG<br>GCAAGCAGAAGCACAAGATCAAGTCTAGGCAATTTGAAGAGGAGATCGCGCAAGGTGCTGAAGACAGCATC<br>GAGC           |     | 148 |
| See-F3-3          | CTCCTCGTCATACTCTGTCT                                                                                                                                                 | 28  | 20  |
| See-B3-3          | GTTTTGTTGCTCTGTGCG                                                                                                                                                   | 240 | 18  |
| See-FIP(F1c+F2)-3 | GATCTTGTGCTTCTGCTTGCCGTCTGCTCATCCTCTACAATC                                                                                                                           |     | 42  |
| See-BIP(B1c+B2)-3 | ATCGCGCAAGGTGCTGAATTCAGACGAATCGTGAACC                                                                                                                                |     | 37  |
| See-LoopF-3       | AATGGCAGAGGACGAACG                                                                                                                                                   | 99  | 18  |
| See-LoopB-3       | CGAGCTGTTTCGAGTTTCCT                                                                                                                                                 | 171 | 19  |
| See-F2-3          | GTCTGCTCATCCTCTACAATC                                                                                                                                                | 57  | 21  |
| See-F1c-3         | GATCTTGTGCTTCTGCTTGCC                                                                                                                                                | 120 | 21  |
| See-B2-3          | TTCAGACGAATCGTGAACC                                                                                                                                                  | 210 | 19  |
| See-B1c-3         | ATCGCGCAAGGTGCTGAA                                                                                                                                                   | 145 | 18  |
| Product           | GTCTGCTCATCCTCTACAATCGTTTCGTTTCGTCCTCTGCCATTGGCAAGCAGAAGCACAAGATCAAGTCTAGG<br>CAATTTGAAGAGGAGATCGCGCAAGGTGCTGAAGACAGCATCGAGCTGTTTCGAGTTTCCTCGGGTTCACGA<br>TTCGTCTGAA |     | 154 |
| See-F3-4          | CACCTTCGTTTCACTGCT                                                                                                                                                   | 12  | 18  |
| See-B3-4          | GTTTTGTTGCTCTGTGCG                                                                                                                                                   | 240 | 18  |
| See-FIP(F1c+F2)-4 | CAATGGCAGAGGACGAACGACATACTCTGTCTTGCCACG                                                                                                                              |     | 40  |
| See-BIP(B1c+B2)-4 | ATCGCGCAAGGTGCTGAATTCAGACGAATCGTGAACC                                                                                                                                |     | 37  |
| See-LoopF-4       | AACGATTGTAGAGGATGAGCAG                                                                                                                                               | 80  | 22  |
| See-LoopB-4       | CGAGCTGTTTCGAGTTTCCT                                                                                                                                                 | 171 | 19  |
| See-F2-4          | CATACTCTGTCTTGCCACG                                                                                                                                                  | 36  | 20  |
| See-F1c-4         | CAATGGCAGAGGACGAACGA                                                                                                                                                 | 100 | 20  |

|                   |                                                                                                                                                                                         |     |     |
|-------------------|-----------------------------------------------------------------------------------------------------------------------------------------------------------------------------------------|-----|-----|
| See-B2-4          | TTCAGACGAATCGTGAACC                                                                                                                                                                     | 210 | 19  |
| See-B1c-4         | ATCGCGCAAGGTGCTGAA                                                                                                                                                                      | 145 | 18  |
| Product           | CATACTCTGTCTTGTCCACGTGTCTGCTCATCCTCTACAATCGTTTCGTTTCGTCTCTGCCATTGGCAAGCAG<br>AAGCACAAGATCAAGTCTAGGCAATTTGAAGAGGAGATCGCGCAAGGTGCTGAAGACAGCATCGAGCTGTT<br>CGAGTTTCCTCGGGTTCACGATTCGTCTGAA |     | 175 |
| Pit-F3-1          | TTGTTCTGCTCATCGTGG                                                                                                                                                                      | 20  | 18  |
| Pit-B3-1          | CATGACCACCGTCTTGAAT                                                                                                                                                                     | 318 | 19  |
| Pit-FIP(F1c+F2)-1 | GCGAACCTGTGAAGCCGAATCTCTACCGATGCCTCAAT                                                                                                                                                  |     | 38  |
| Pit-BIP(B1c+B2)-1 | TCGGCAAGGAACCTGACAACGGCGGATTCTTGATGATGA                                                                                                                                                 |     | 39  |
| Pit-LoopF-1       | CCACCATCTCCGGTTGAG                                                                                                                                                                      | 150 | 18  |
| Pit-LoopB-1       | GGCCAAGTACAGATCAAGATCA                                                                                                                                                                  | 190 | 22  |
| Pit-F2-1          | TCTCTACCGATGCCTCAAT                                                                                                                                                                     | 95  | 19  |
| Pit-F1c-1         | GCGAACCTGTGAAGCCGAA                                                                                                                                                                     | 169 | 19  |
| Pit-B2-1          | GGCGGATTCTTGATGATGA                                                                                                                                                                     | 242 | 19  |
| Pit-B1c-1         | TCGGCAAGGAACCTGACAAC                                                                                                                                                                    | 170 | 20  |
| Product           | TCTCTACCGATGCCTCAATGAGCTCGGCTGCTGGCAAGCTCAACCGGAGATGGTGGTTCGGCTTCACAGGT<br>TCGCTCGGCAAGGAACCTGACAACGGCCAAGTACAGATCAAGATCATCCCAGACGCGCTCATCATCAAGAAT<br>CCGCC                            |     | 148 |
| Pit-F3-2          | TTGTTCTGCTCATCGTGG                                                                                                                                                                      | 20  | 18  |
| Pit-B3-2          | ACCACCGTCTTGAATCTTG                                                                                                                                                                     | 314 | 19  |
| Pit-FIP(F1c+F2)-2 | GCGAACCTGTGAAGCCGAATCTCTACCGATGCCTCAAT                                                                                                                                                  |     | 38  |
| Pit-BIP(B1c+B2)-2 | TCGGCAAGGAACCTGACAACGGCGGATTCTTGATGATGA                                                                                                                                                 |     | 39  |
| Pit-LoopF-2       | CCACCATCTCCGGTTGAG                                                                                                                                                                      | 150 | 18  |
| Pit-LoopB-2       | GGCCAAGTACAGATCAAGATCA                                                                                                                                                                  | 190 | 22  |

|                   |                                                                                                                                                                |     |     |
|-------------------|----------------------------------------------------------------------------------------------------------------------------------------------------------------|-----|-----|
| Pit-F2-2          | TCTCTACCGATGCCTCAAT                                                                                                                                            | 95  | 19  |
| Pit-F1c-2         | GCGAACCTGTGAAGCCGAA                                                                                                                                            | 169 | 19  |
| Pit-B2-2          | GGCGGATTCTTGATGATGA                                                                                                                                            | 242 | 19  |
| Pit-B1c-2         | TCGGCAAGGAACCTGACAAC                                                                                                                                           | 170 | 20  |
| Product           | TCTCTACCGATGCCTCAATGAGCTCGGCTGCTGGCAAGCTCAACCGGAGATGGTGGTTCGGCTTCACAGGT<br>TCGCTCGGCAAGGAACCTGACAACGGCCAAGTACAGATCAAGATCATCCCAGACGCGCTCATCATCAAGAAT<br>CCGCC   |     | 148 |
| Pit-F3-3          | TTTCGCTCAGCCTTTGTT                                                                                                                                             | 7   | 18  |
| Pit-B3-3          | GGCGGATTCTTGATGATGA                                                                                                                                            | 242 | 19  |
| Pit-FIP(F1c+F2)-3 | GTTGAGCTTGCCAGCAGCCAACATGTTCAAGCTATTCCG                                                                                                                        |     | 39  |
| Pit-BIP(B1c+B2)-3 | GTGGTTCGGCTTCACAGGTTGATCTTGATCTGTACTIONGGC                                                                                                                     |     | 40  |
| Pit-LoopF-3       | GCTCATTGAGGCATCGGTA                                                                                                                                            | 117 | 19  |
| Pit-LoopB-3       | CGGCAAGGAACCTGACAA                                                                                                                                             | 171 | 18  |
| Pit-F2-3          | CAACATGTTCAAGCTATTCCG                                                                                                                                          | 61  | 21  |
| Pit-F1c-3         | GTTGAGCTTGCCAGCAGC                                                                                                                                             | 138 | 18  |
| Pit-B2-3          | TGATCTTGATCTGTACTIONGGC                                                                                                                                        | 211 | 21  |
| Pit-B1c-3         | GTGGTTCGGCTTCACAGGT                                                                                                                                            | 147 | 19  |
| Product           | CAACATGTTCAAGCTATTCCGGTGCGTCGATCGCTCTCTACCGATGCCTCAATGAGCTCGGCTGCTGGCAAG<br>CTCAACCGGAGATGGTGGTTCGGCTTCACAGGTTGCTCGGCAAGGAACCTGACAACGGCCAAGTACAGAT<br>CAAGATCA |     | 151 |
| Pit-F3-4          | TCTCTACCGATGCCTCAA                                                                                                                                             | 95  | 18  |
| Pit-B3-4          | TTAGGATCTGTCGGCATGA                                                                                                                                            | 332 | 19  |
| Pit-FIP(F1c+F2)-4 | TTGTCAGGTTCCCTTGCCGAGCAAGCTCAACCGGAGATG                                                                                                                        |     | 38  |
| Pit-BIP(B1c+B2)-4 | CATCCCAGACGCGCTCATGATTAGCTTGTTTCAGATCGTCT                                                                                                                      |     | 40  |
| Pit-LoopF-4       | AACCTGTGAAGCCGAACC                                                                                                                                             | 166 | 18  |

|                          |                                                                                                                                                         |     |     |
|--------------------------|---------------------------------------------------------------------------------------------------------------------------------------------------------|-----|-----|
| Pit-LoopB-4              | ATCAAGAATCCGCCTGCC                                                                                                                                      | 229 | 18  |
| Pit-F2-4                 | CAAGCTCAACCGGAGATG                                                                                                                                      | 129 | 18  |
| Pit-F1c-4                | TTGTCAGGTTCCCTTGCCGAG                                                                                                                                   | 188 | 20  |
| Pit-B2-4                 | GATTAGCTTGTTTCAGATCGTCT                                                                                                                                 | 273 | 22  |
| Pit-B1c-4                | CATCCCAGACGCGCTCAT                                                                                                                                      | 210 | 18  |
| Product                  | CAAGCTCAACCGGAGATGGTGGTTCGGCTTCACAGGTTGCTCGGCAAGGAACCTGACAACGGCCAAGTAC<br>AGATCAAGATCATCCCAGACGCGCTCATCATCAAGAATCCGCCTGCCAACAAGACGATCTGAACAAGCTAAT<br>C |     | 145 |
|                          |                                                                                                                                                         |     |     |
| Pep-F3-1                 | GACTCGTGACCAATGCC                                                                                                                                       | 328 | 18  |
| Pep-B3-1                 | TACCGATTCCTCCTAGCAG                                                                                                                                     | 520 | 19  |
| Pep-FIP(F1c+F2)-1        | TGGCTTGAACCGCATCGTAAGGTATCTTCAATGTGATTGTGC                                                                                                              |     | 42  |
| Pep-BIP(B1c+B2)-1        | AGGGTGGCACTGGAGGAATCCTGGTCGTTAGAGTCTG                                                                                                                   |     | 37  |
| Pep-LoopF-1              | GCCTGAGATCCAAGAGCATT                                                                                                                                    | 401 | 20  |
| Pep-LoopB-1              | CACTGACGACGACACCTC                                                                                                                                      | 444 | 18  |
| Pep-F2-1                 | GGTATCTTCAATGTGATTGTGC                                                                                                                                  | 349 | 22  |
| Pep-F1c-1                | TGGCTTGAACCGCATCGTAA                                                                                                                                    | 421 | 20  |
| Pep-B2-1                 | TCCTGGTCGTTAGAGTCTG                                                                                                                                     | 485 | 19  |
| Pep-B1c-1                | AGGGTGGCACTGGAGGAA                                                                                                                                      | 422 | 18  |
| Product                  | GGTATCTTCAATGTGATTGTGCCCGCTTCGTCCAATGCTCTTGGATCTCAGGCTTACGATGCGGTTCAAGCCA<br>AGGGTGGCACTGGAGGAACCGGCACTGACGACGACACCTCGGCCCCAGACTCTAACGACCAGGA           |     | 137 |
| <b>Pep-F3-2</b>          | TCGTGTACCAATGCCAAAG                                                                                                                                     | 331 | 19  |
| <b>Pep-B3-2</b>          | TACCGATTCCTCCTAGCAG                                                                                                                                     | 520 | 19  |
| <b>Pep-FIP(F1c+F2)-2</b> | TGGCTTGAACCGCATCGTAAGTATCTTCAATGTGATTGTGCC                                                                                                              |     | 42  |
| <b>Pep-BIP(B1c+B2)-2</b> | AGGGTGGCACTGGAGGAATCCTGGTCGTTAGAGTCTG                                                                                                                   |     | 37  |

|                    |                                                                                                                                                                        |     |     |
|--------------------|------------------------------------------------------------------------------------------------------------------------------------------------------------------------|-----|-----|
| <b>Pep-LoopF-2</b> | GCCTGAGATCCAAGAGCATT                                                                                                                                                   | 401 | 20  |
| <b>Pep-LoopB-2</b> | CACTGACGACGACACCTC                                                                                                                                                     | 444 | 18  |
| <b>Pep-F2-2</b>    | GTATCTTCAATGTGATTGTGCC                                                                                                                                                 | 350 | 22  |
| <b>Pep-F1c-2</b>   | TGGCTTGAACCGCATCGTAA                                                                                                                                                   | 421 | 20  |
| <b>Pep-B2-2</b>    | TCCTGGTCGTTAGAGTCTG                                                                                                                                                    | 485 | 19  |
| <b>Pep-B1c-2</b>   | AGGGTGGCACTGGAGGAA                                                                                                                                                     | 422 | 18  |
| <b>Product</b>     | GTATCTTCAATGTGATTGTGCCCGCTTCGTCCAATGCTCTTGGATCTCAGGCTTACGATGCGGTTCAAGCCAA<br>GGGTGGCACTGGAGGAACCGGCACTGACGACGACACCTCGGCCCCAGACTCTAACGACCAGGA                           |     | 136 |
| Pep-F3-3           | CAACAATTCGTACACACTGC                                                                                                                                                   | 252 | 20  |
| Pep-B3-3           | TACCGATTCCTCCTAGCAG                                                                                                                                                    | 520 | 19  |
| Pep-FIP(F1c+F2)-3  | CGTAAGCCTGAGATCCAAGAGCGACTCGTGTACCAATGCC                                                                                                                               |     | 40  |
| Pep-BIP(B1c+B2)-3  | AAGGGTGGCACTGGAGGATCCTGGTCGTTAGAGTCTG                                                                                                                                  |     | 37  |
| Pep-LoopF-3        | CGGGCACAATCACATTGAAG                                                                                                                                                   | 373 | 20  |
| Pep-LoopB-3        | CACTGACGACGACACCTC                                                                                                                                                     | 444 | 18  |
| Pep-F2-3           | GACTCGTGTACCAATGCC                                                                                                                                                     | 328 | 18  |
| Pep-F1c-3          | CGTAAGCCTGAGATCCAAGAGC                                                                                                                                                 | 406 | 22  |
| Pep-B2-3           | TCCTGGTCGTTAGAGTCTG                                                                                                                                                    | 485 | 19  |
| Pep-B1c-3          | AAGGGTGGCACTGGAGGA                                                                                                                                                     | 421 | 18  |
| <b>Product</b>     | GACTCGTGTACCAATGCCAAAGGTATCTTCAATGTGATTGTGCCCGCTTCGTCCAATGCTCTTGGATCTCAGG<br>CTTACGATGCGGTTCAAGCCAAGGGTGGCACTGGAGGAACCGGCACTGACGACGACACCTCGGCCCCAGA<br>CTCTAACGACCAGGA |     | 158 |
| Pep-F3-4           | AGGGACAACAATTCGTACAC                                                                                                                                                   | 247 | 20  |
| Pep-B3-4           | TACCGATTCCTCCTAGCAG                                                                                                                                                    | 520 | 19  |
| Pep-FIP(F1c+F2)-4  | CGTAAGCCTGAGATCCAAGAGCGCGACTCGTGTACCAATG                                                                                                                               |     | 40  |
| Pep-BIP(B1c+B2)-4  | AAGGGTGGCACTGGAGGATCCTGGTCGTTAGAGTCTG                                                                                                                                  |     | 37  |

|                    |                                                                                                                                                                                                   |     |     |
|--------------------|---------------------------------------------------------------------------------------------------------------------------------------------------------------------------------------------------|-----|-----|
| Pep-LoopF-4        | CGGGCACAATCACATTGAAG                                                                                                                                                                              | 373 | 20  |
| Pep-LoopB-4        | CACTGACGACGACACCTC                                                                                                                                                                                | 444 | 18  |
| Pep-F2-4           | GCGACTCGTGTACCAATG                                                                                                                                                                                | 326 | 18  |
| Pep-F1c-4          | CGTAAGCCTGAGATCCAAGAGC                                                                                                                                                                            | 406 | 22  |
| Pep-B2-4           | TCCTGGTCGTTAGAGTCTG                                                                                                                                                                               | 485 | 19  |
| Pep-B1c-4          | AAGGGTGGCACTGGAGGA                                                                                                                                                                                | 421 | 18  |
| Product            | GCGACTCGTGTACCAATGCCAAAGGTATCTTCAATGTGATTGTGCCCGCTTCGTCCAATGCTCTTGGATCTCA<br>GGCTTACGATGCGGTTCAAGCCAAGGGTGGCACTGGAGGAACCGGCACTGACGACGACACCTCGGCCCA<br>GACTCTAACGACCAGGA                           |     | 160 |
|                    |                                                                                                                                                                                                   |     |     |
| mPep-F3-1          | ACTGGTTCTCCTCGGTC                                                                                                                                                                                 | 146 | 17  |
| mPep-B3-1          | TACCGATTCCTCCTAGCAG                                                                                                                                                                               | 535 | 19  |
| mPep-FIP(F1c+F2)-1 | AGGCACAATCACATTGAAGATACCTGGACAACAATTCGTACACA                                                                                                                                                      |     | 44  |
| mPep-BIP(B1c+B2)-1 | CTCAGGCTTACGATGCGGTTTGTGTCGTCAGTGC                                                                                                                                                                |     | 35  |
| mPep-LoopF-1       | TGGCATTGGTACACGAGTC                                                                                                                                                                               | 346 | 19  |
| mPep-LoopB-1       | AGGAGCAGGCACTGGA                                                                                                                                                                                  | 435 | 16  |
| mPep-F2-1          | GGACAACAATTCGTACACA                                                                                                                                                                               | 249 | 19  |
| mPep-F1c-1         | AGGCACAATCACATTGAAGATACCT                                                                                                                                                                         | 372 | 25  |
| mPep-B2-1          | TGTCGTCGTCAGTGC                                                                                                                                                                                   | 472 | 15  |
| mPep-B1c-1         | CTCAGGCTTACGATGCGGTT                                                                                                                                                                              | 395 | 20  |
| Product            | CGCTCAAGCCGCTTGAAAAGCATTTTCGAGCAACGTGCGCGACTCGTGTACCAATGCCAAAGGTATCTTC<br>AATGTGATTGTGCCTGCTTCGTCCAATGCTCTTGGATCTCAGGCTTACGATGCGGTTCAAGCCAAGGGTGG<br>CACCGGAGGAGCAGGCACTGGAGGAACCGGCACTGACGACGACA |     | 224 |
| <b>mPep-F3-2</b>   | GACTCGTGTACCAATGCC                                                                                                                                                                                | 328 | 18  |
| <b>mPep-B3-2</b>   | TACCGATTCCTCCTAGCAG                                                                                                                                                                               | 535 | 19  |



|                           |                                                                                                                   |     |     |
|---------------------------|-------------------------------------------------------------------------------------------------------------------|-----|-----|
| <b>mPep-FIP(F1c+F2)-2</b> | TGGCTTGAACCGCATCGTAATGCCTGCTTCGTCCA                                                                               |     | 35  |
| <b>mPep-BIP(B1c+B2)-2</b> | GTGGCACCGGAGGAGCTGTCGTCAGTGC                                                                                      |     | 31  |
| <b>mPep-LoopF-2</b>       | GCCTGAGATCCAAGAGCAT                                                                                               | 401 | 19  |
| <b>mPep-LoopB-2</b>       | GGCACTGGAGGAACCG                                                                                                  | 442 | 16  |
| <b>mPep-F2-2</b>          | TGCCTGCTTCGTCCA                                                                                                   | 368 | 15  |
| <b>mPep-F1c-2</b>         | TGGCTTGAACCGCATCGTAA                                                                                              | 421 | 20  |
| <b>mPep-B2-2</b>          | TGTCGTCGTCAGTGC                                                                                                   | 472 | 15  |
| <b>mPep-B1c-2</b>         | GTGGCACCGGAGGAGC                                                                                                  | 425 | 16  |
| Product                   | TGCCTGCTTCGTCCAATGCTCTTGGATCTCAGGCTTACGATGCGGTTCAAGCCAAGGGTGGCACCGGAGGA<br>GCAGGCACTGGAGGAACCGGCACTGACGACGACA     |     | 105 |
| mPep-F3-3                 | GCGACTCGTGTAACCAATG                                                                                               | 326 | 18  |
| mPep-B3-3                 | TACCGATTCCTCCTAGCAG                                                                                               | 535 | 19  |
| mPep-FIP(F1c+F2)-3        | TGGCTTGAACCGCATCGTAAATTGTGCCTGCTTCGTC                                                                             |     | 37  |
| mPep-BIP(B1c+B2)-3        | GTGGCACCGGAGGAGCTGTCGTCAGTGC                                                                                      |     | 31  |
| mPep-LoopF-3              | GCCTGAGATCCAAGAGCATT                                                                                              | 401 | 20  |
| mPep-LoopB-3              | GGCACTGGAGGAACCG                                                                                                  | 442 | 16  |
| mPep-F2-3                 | ATTGTGCCTGCTTCGTC                                                                                                 | 364 | 17  |
| mPep-F1c-3                | TGGCTTGAACCGCATCGTAA                                                                                              | 421 | 20  |
| mPep-B2-3                 | TGTCGTCGTCAGTGC                                                                                                   | 472 | 15  |
| mPep-B1c-3                | GTGGCACCGGAGGAGC                                                                                                  | 425 | 16  |
| Product                   | ATTGTGCCTGCTTCGTCCAATGCTCTTGGATCTCAGGCTTACGATGCGGTTCAAGCCAAGGGTGGCACCGG<br>AGGAGCAGGCACTGGAGGAACCGGCACTGACGACGACA |     | 109 |
| mPep-F3-4                 | GCGACTCGTGTAACCAAT                                                                                                | 326 | 17  |
| mPep-B3-4                 | TACCGATTCCTCCTAGCAG                                                                                               | 535 | 19  |
| mPep-FIP(F1c+F2)-4        | TGGCTTGAACCGCATCGTAAGATTGTGCCTGCTTCGT                                                                             |     | 37  |

|                    |                                                                                                                     |     |     |
|--------------------|---------------------------------------------------------------------------------------------------------------------|-----|-----|
| mPep-BIP(B1c+B2)-4 | GTGGCACCGGAGGAGCTGTCGTCGTCAGTGC                                                                                     |     | 31  |
| mPep-LoopF-4       | GCCTGAGATCCAAGAGCATT                                                                                                | 401 | 20  |
| mPep-LoopB-4       | GGCACTGGAGGAACCG                                                                                                    | 442 | 16  |
| mPep-F2-4          | GATTGTGCCTGCTTCGT                                                                                                   | 363 | 17  |
| mPep-F1c-4         | TGGCTTGAACCGCATCGTAA                                                                                                | 421 | 20  |
| mPep-B2-4          | TGTCGTCGTCAGTGC                                                                                                     | 472 | 15  |
| mPep-B1c-4         | GTGGCACCGGAGGAGC                                                                                                    | 425 | 16  |
| Product            | GATTGTGCCTGCTTCGTCCAATGCTCTTGGATCTCAGGCTTACGATGCGGTTCAAGCCAAGGGTGGCACCG<br>GAGGAGCAGGCACTGGAGGAACCGGCACTGACGACGACA  |     | 110 |
| mPep-F3-5          | GCGACTCGTGTACCAA                                                                                                    | 326 | 16  |
| mPep-B3-5          | TACCGATTCCTCCTAGCAG                                                                                                 | 535 | 19  |
| mPep-FIP(F1c+F2)-5 | TGGCTTGAACCGCATCGTAATGATTGTGCCTGCTTCG                                                                               |     | 37  |
| mPep-BIP(B1c+B2)-5 | GTGGCACCGGAGGAGCTGTCGTCGTCAGTGC                                                                                     |     | 31  |
| mPep-LoopF-5       | GCCTGAGATCCAAGAGCATT                                                                                                | 401 | 20  |
| mPep-LoopB-5       | GGCACTGGAGGAACCG                                                                                                    | 442 | 16  |
| mPep-F2-5          | TGATTGTGCCTGCTTCG                                                                                                   | 362 | 17  |
| mPep-F1c-5         | TGGCTTGAACCGCATCGTAA                                                                                                | 421 | 20  |
| mPep-B2-5          | TGTCGTCGTCAGTGC                                                                                                     | 472 | 15  |
| mPep-B1c-5         | GTGGCACCGGAGGAGC                                                                                                    | 425 | 16  |
| Product            | TGATTGTGCCTGCTTCGTCCAATGCTCTTGGATCTCAGGCTTACGATGCGGTTCAAGCCAAGGGTGGCACC<br>GGAGGAGCAGGCACTGGAGGAACCGGCACTGACGACGACA |     | 111 |
| mPep-F3-6          | GGACAACAATTCGTACACA                                                                                                 | 249 | 19  |
| mPep-B3-6          | TACCGATTCCTCCTAGCAG                                                                                                 | 535 | 19  |
| mPep-FIP(F1c+F2)-6 | AACCGCATCGTAAGCCTGAGGGTATCTTCAATGTGATTGTGC                                                                          |     | 42  |
| mPep-BIP(B1c+B2)-6 | GTGGCACCGGAGGAGCTGTCGTCGTCAGTGC                                                                                     |     | 31  |

|                    |                                                                                                                                                                                                                                                                                                                                                                                                                                          |     |     |
|--------------------|------------------------------------------------------------------------------------------------------------------------------------------------------------------------------------------------------------------------------------------------------------------------------------------------------------------------------------------------------------------------------------------------------------------------------------------|-----|-----|
| mPep-LoopF-6       | AAGAGCATTGGACGAAGCA                                                                                                                                                                                                                                                                                                                                                                                                                      | 390 | 19  |
| mPep-LoopB-6       | GGCACTGGAGGAACCG                                                                                                                                                                                                                                                                                                                                                                                                                         | 442 | 16  |
| mPep-F2-6          | GGTATCTTCAATGTGATTGTGC                                                                                                                                                                                                                                                                                                                                                                                                                   | 349 | 22  |
| mPep-F1c-6         | AACCGCATCGTAAGCCTGAG                                                                                                                                                                                                                                                                                                                                                                                                                     | 414 | 20  |
| mPep-B2-6          | TGTCGTCGTCAGTGC                                                                                                                                                                                                                                                                                                                                                                                                                          | 472 | 15  |
| mPep-B1c-6         | GTGGCACCGGAGGAGC                                                                                                                                                                                                                                                                                                                                                                                                                         | 425 | 16  |
| Product            | GGTATCTTCAATGTGATTGTGCCTGCTTCGTCCAATGCTCTTGGATCTCAGGCTTACGATGCGGTTCAAGCC<br>AAGGGTGGCACCGGAGGAGCAGGCACTGGAGGAACCGGCACTGACGACGACA                                                                                                                                                                                                                                                                                                         |     | 124 |
| mPep-F3-7          | CAAGCCACGCTTCTCT                                                                                                                                                                                                                                                                                                                                                                                                                         | 19  | 16  |
| mPep-B3-7          | TACCGATTCCTCCTAGCAG                                                                                                                                                                                                                                                                                                                                                                                                                      | 535 | 19  |
| mPep-FIP(F1c+F2)-7 | CGCCGACTTCGACCGAGCGTCCATGCCGATGC                                                                                                                                                                                                                                                                                                                                                                                                         |     | 32  |
| mPep-BIP(B1c+B2)-7 | CTCAGGCTTACGATGCGGTTTGTGTCGTCAGTGC                                                                                                                                                                                                                                                                                                                                                                                                       |     | 35  |
| mPep-LoopF-7       | GGCAATGGTACCGCACC                                                                                                                                                                                                                                                                                                                                                                                                                        | 104 | 17  |
| mPep-LoopB-7       | AGGAGCAGGCACTGGA                                                                                                                                                                                                                                                                                                                                                                                                                         | 435 | 16  |
| mPep-F2-7          | CGTCCATGCCGATGC                                                                                                                                                                                                                                                                                                                                                                                                                          | 69  | 15  |
| mPep-F1c-7         | CGCCGACTTCGACCGAG                                                                                                                                                                                                                                                                                                                                                                                                                        | 172 | 17  |
| mPep-B2-7          | TGTCGTCGTCAGTGC                                                                                                                                                                                                                                                                                                                                                                                                                          | 472 | 15  |
| mPep-B1c-7         | CTCAGGCTTACGATGCGGTT                                                                                                                                                                                                                                                                                                                                                                                                                     | 395 | 20  |
| Product            | CGTCCATGCCGATGCTGCGGGTGCGGTACCATTGCCGAATTTCAAGGTAGACCCGCAACCTCTGGCCAGC<br>ACGTTTTACTGGTTCTCCTCGGTGCGAAGTCGGCGTTTGCTACAACCCGCAAGCTCGCGTTGGCAGCACCAA<br>AGGCGCTCTTCACTGCACACACCAAGAAAACACTACGACAGGGACAACAATTCGTACACACTGCCGCAAACGT<br>GCGTGGCGCTCAAGCCGCTTGAAAAGCATTTCGAGCAACGTGCGGACTCGTGTACCAATGCCAAAGGT<br>ATCTTCAATGTGATTGTGCCTGCTTCGTCCAATGCTCTTGGATCTCAGGCTTACGATGCGGTTCAAGCCAAG<br>GGTGGCACCGGAGGAGCAGGCACTGGAGGAACCGGCACTGACGACGACA |     | 404 |

\* Primers name in bold type indicates the optimum RealAmp primer sets Pep-2 and mPep-2 that designed for *U. maydis* of Clade A and Clade B, respectively.
