# Supplementary material for: Development of a real-time fluorescence loop-mediated isothermal amplification assay for rapid and quantitative detection of Ustilago maydis
Source: PubMed Central journal article supplement (PMC5645423; doi:10.1038/s41598-017-13881-4), 2017-10-17
Supplement: 41598_2017_13881_MOESM3_ESM.pdf [file 41598_2017_13881_MOESM3_ESM.pdf]

**TITLE:**

Development of a real-time fluorescence loop-mediated isothermal amplification assay for rapid and quantitative detection of *Ustilago maydis*

**AUTHORS:**

Yanyong Cao<sup>1, +</sup>, Lifeng Wang<sup>1, +</sup>, Liping Duan<sup>2</sup>, Jingjing Li<sup>1</sup>, Juan Ma<sup>1</sup>, Shuna Xie<sup>3</sup>, Lei Shi<sup>2</sup> & Huiyong Li<sup>1</sup>

**AFFILIATION:**

<sup>1</sup> Institute of Cereal Crops, Henan Academy of Agricultural Sciences, Zhengzhou, 450002, China

<sup>2</sup> Institute of Food Safety and Nutrition, Jinan University, Guangzhou, 510632, China

<sup>3</sup> Institute of Plant Protection, Henan Academy of Agricultural Sciences, Zhengzhou, 450002, China

Correspondence and requests for materials should be addressed to Y.C. (email: [yanyongcao@126.com](mailto:yanyongcao@126.com)) or H.L. (email: [lihuiyong1977@126.com](mailto:lihuiyong1977@126.com))

+These authors contribute equally to this work.

**Supplementary Table S2. Quantification of soil and maize plants samples by RealAmp assay using ZYD-S1 Soil Samples**

**Soil samples**

| Samples NO. | Field <sup>a</sup> | Tt         | spores g-1soil |          |          | LAMP products amplification | Sequencing analysis <sup>b</sup> | Growth on media <sup>c</sup> | PCR with Pok317/Pok318 | Sequencing analysis <sup>d</sup> |
|-------------|--------------------|------------|----------------|----------|----------|-----------------------------|----------------------------------|------------------------------|------------------------|----------------------------------|
|             |                    |            | Test 1         | Test 2   | Average  |                             |                                  |                              |                        |                                  |
| 1           | A1                 | 12.25±0.25 | 5.62E+04       | 9.45E+04 | 7.53E+04 | +                           | Clade A                          | +                            | +                      | Clade A                          |
| 2           | A1                 | 15±0       | 4.16E+03       | 4.16E+03 | 4.16E+03 | +                           | Clade A                          | +                            | +                      | Clade A                          |
| 3           | A1                 | 10.75±0.25 | 4.51E+05       | 2.68E+05 | 3.59E+05 | +                           | Clade A                          | +                            | +                      | Clade A                          |
| 4           | A1                 | 11.75±0.25 | 9.45E+04       | 1.59E+05 | 1.27E+05 | +                           | Clade A                          | +                            | +                      | Clade A                          |
| 5           | A1                 | 13±0       | 3.34E+04       | 3.34E+04 | 3.34E+04 | +                           | Clade A                          | +                            | +                      | Clade A                          |
| 6           | A2                 | 12.75±0.25 | 5.62E+04       | 3.34E+04 | 4.48E+04 | +                           | Clade A                          | +                            | +                      | Clade A                          |
| 7           | A2                 | 10.5±0     | 4.51E+05       | 4.51E+05 | 4.51E+05 | +                           | Clade A                          | +                            | +                      | Clade A                          |
| 8           | A2                 | 14.5±0     | 7.00E+03       | 7.00E+03 | 7.00E+03 | +                           | Clade A                          | +                            | +                      | Clade A                          |
| 9           | A2                 | 11.5±0.5   | 2.68E+05       | 9.45E+04 | 1.81E+05 | +                           | Clade A                          | +                            | +                      | Clade A                          |
| 10          | A2                 | 11.75±0.25 | 1.59E+05       | 9.45E+04 | 1.27E+05 | +                           | Clade A                          | +                            | +                      | Clade A                          |
| 11          | A3                 | 15.5±0.5   | 4.16E+03       | 1.47E+03 | 2.81E+03 | +                           | Clade A                          | +                            | +                      | Clade A                          |
| 12          | A3                 | 15.25±0.25 | 4.16E+03       | 2.47E+03 | 3.31E+03 | +                           | Clade A                          | +                            | +                      | Clade A                          |
| 13          | A3                 | 15±0       | 4.16E+03       | 4.16E+03 | 4.16E+03 | +                           | Clade A                          | +                            | +                      | Clade A                          |
| 14          | A3                 | 15.25±0.25 | 2.47E+03       | 4.16E+03 | 3.31E+03 | +                           | Clade A                          | +                            | +                      | Clade A                          |
| 15          | A3                 | 14.25±0.25 | 7.00E+03       | 1.18E+04 | 9.39E+03 | +                           | Clade A                          | +                            | +                      | Clade A                          |
| 16          | A4                 | 11.25±0.25 | 1.59E+05       | 2.68E+05 | 2.13E+05 | +                           | Clade A                          | +                            | +                      | Clade A                          |
| 17          | A4                 | 12.25±0.25 | 5.62E+04       | 9.45E+04 | 7.53E+04 | +                           | Clade A                          | +                            | +                      | Clade A                          |
| 18          | A4                 | 10.5±0     | 4.51E+05       | 4.51E+05 | 4.51E+05 | +                           | Clade A                          | +                            | +                      | Clade A                          |
| 19          | A4                 | 12.75±0.25 | 3.34E+04       | 5.62E+04 | 4.48E+04 | +                           | Clade A                          | +                            | +                      | Clade A                          |
| 20          | A4                 | NA         | -              | -        | -        | -                           | N/A                              | -                            | -                      | N/A                              |

|    |    |            |          |          |          |   |         |   |   |         |
|----|----|------------|----------|----------|----------|---|---------|---|---|---------|
| 21 | A5 | 12.75±0.25 | 3.34E+04 | 5.62E+04 | 4.48E+04 | + | Clade A | + | + | Clade A |
| 22 | A5 | 10.25±0.25 | 4.51E+05 | 7.59E+05 | 6.05E+05 | + | Clade A | + | + | Clade A |
| 23 | A5 | 9.25±0.25  | 1.28E+06 | 2.15E+06 | 1.71E+06 | + | Clade A | + | + | Clade A |
| 24 | A5 | 12.25±0.25 | 5.62E+04 | 9.45E+04 | 7.53E+04 | + | Clade A | + | + | Clade A |
| 25 | A5 | N/A        | -        | -        | -        | - | N/A     | - | - | N/A     |
| 26 | B1 | N/A        | -        | -        | -        | - | N/A     | - | - | N/A     |
| 27 | B1 | N/A        | -        | -        | -        | - | N/A     | - | - | N/A     |
| 28 | B1 | N/A        | -        | -        | -        | - | N/A     | - | - | N/A     |
| 29 | B1 | N/A        | -        | -        | -        | - | N/A     | - | - | N/A     |
| 30 | B1 | N/A        | -        | -        | -        | - | N/A     | - | - | N/A     |
| 31 | B2 | 13.25±0.25 | 1.98E+04 | 3.34E+04 | 2.66E+04 | + | Clade A | + | + | Clade A |
| 32 | B2 | 13.25±0.25 | 1.98E+04 | 3.34E+04 | 2.66E+04 | + | Clade A | + | + | Clade A |
| 33 | B2 | 7.5±0      | 1.03E+07 | 1.03E+07 | 1.03E+07 | + | Clade A | + | + | Clade A |
| 34 | B2 | 8.25±0.25  | 3.62E+06 | 6.09E+06 | 4.86E+06 | + | Clade A | + | + | Clade A |
| 35 | B2 | 14.5±0     | 7.00E+03 | 7.00E+03 | 7.00E+03 | + | Clade A | + | + | Clade A |
| 36 | B3 | 13.35±0.15 | 1.98E+04 | 2.71E+04 | 2.35E+04 | + | Clade A | + | + | Clade A |
| 37 | B3 | 10.5±0     | 4.51E+05 | 4.51E+05 | 4.51E+05 | + | Clade A | + | + | Clade A |
| 38 | B3 | N/A        | -        | -        | -        | - | N/A     | - | - | N/A     |
| 39 | B3 | 11.5±0     | 1.59E+05 | 1.59E+05 | 1.59E+05 | + | Clade A | + | + | Clade A |
| 40 | B3 | 12.5±0.5   | 9.45E+04 | 3.34E+04 | 6.39E+04 | + | Clade A | + | + | Clade A |
| 41 | B4 | 10.75±0.25 | 4.51E+05 | 2.68E+05 | 3.59E+05 | + | Clade A | + | + | Clade A |
| 42 | B4 | 10.75±0.25 | 2.68E+05 | 4.51E+05 | 3.59E+05 | + | Clade A | + | + | Clade A |
| 43 | B4 | 14.75±0.25 | 7.00E+03 | 4.16E+03 | 5.58E+03 | + | Clade A | + | + | Clade A |
| 44 | B4 | 14.75±0.25 | 7.00E+03 | 4.16E+03 | 5.58E+03 | + | Clade A | + | + | Clade A |
| 45 | B4 | 13.75±0.25 | 1.98E+04 | 1.18E+04 | 1.58E+04 | + | Clade A | + | + | Clade A |

|    |    |            |          |          |          |   |         |   |   |         |
|----|----|------------|----------|----------|----------|---|---------|---|---|---------|
| 46 | B5 | 8.75±0.25  | 2.15E+06 | 3.62E+06 | 2.88E+06 | + | Clade A | + | + | Clade A |
| 47 | B5 | 12.25±0.25 | 9.45E+04 | 5.62E+04 | 7.53E+04 | + | Clade A | + | + | Clade A |
| 48 | B5 | 8.75±0.25  | 3.62E+06 | 2.15E+06 | 2.88E+06 | + | Clade A | + | + | Clade A |
| 49 | B5 | 10.5±0     | 4.51E+05 | 4.51E+05 | 4.51E+05 | + | Clade A | + | + | Clade A |
| 50 | B5 | N/A        | -        | -        | -        | - | N/A     | - | - | N/A     |
| 51 | C1 | 13.75±0.25 | 1.98E+04 | 1.18E+04 | 1.58E+04 | + | Clade A | + | + | Clade A |
| 52 | C1 | 13.5±0     | 1.98E+04 | 1.98E+04 | 1.98E+04 | + | Clade A | + | + | Clade A |
| 53 | C1 | 12.25±0.25 | 5.62E+04 | 9.45E+04 | 7.53E+04 | + | Clade A | + | + | Clade A |
| 54 | C1 | N/A        | -        | -        | -        | - | N/A     | - | - | N/A     |
| 55 | C1 | 14.75±0.25 | 7.00E+03 | 4.16E+03 | 5.58E+03 | + | Clade A | + | + | Clade A |
| 56 | C2 | 10.75±0.25 | 4.51E+05 | 2.68E+05 | 3.59E+05 | + | Clade A | + | + | Clade A |
| 57 | C2 | 10±0       | 7.59E+05 | 7.59E+05 | 7.59E+05 | + | Clade A | + | + | Clade A |
| 58 | C2 | 13.25±0.25 | 1.98E+04 | 3.34E+04 | 2.66E+04 | + | Clade A | + | + | Clade A |
| 59 | C2 | 10±0.5     | 1.28E+06 | 4.51E+05 | 8.64E+05 | + | Clade A | + | + | Clade A |
| 60 | C2 | 13.25±0.25 | 1.98E+04 | 3.34E+04 | 2.66E+04 | + | Clade A | + | + | Clade A |
| 61 | C3 | N/A        | -        | -        | -        | - | N/A     | - | - | N/A     |
| 62 | C3 | 12.25±0.25 | 5.62E+04 | 9.45E+04 | 7.53E+04 | + | Clade A | + | + | Clade A |
| 63 | C3 | 15.25±0.25 | 4.16E+03 | 2.47E+03 | 3.31E+03 | + | Clade A | + | + | Clade A |
| 64 | C3 | 13.25±0.25 | 1.98E+04 | 3.34E+04 | 2.66E+04 | + | Clade A | + | + | Clade A |
| 65 | C3 | 15.75±0.25 | 2.47E+03 | 1.47E+03 | 1.97E+03 | + | Clade A | + | + | Clade A |
| 66 | C4 | N/A        | -        | -        | -        | - | N/A     | - | - | N/A     |
| 67 | C4 | N/A        | -        | -        | -        | - | N/A     | - | - | N/A     |
| 68 | C4 | 15±0.5     | 7.00E+03 | 2.47E+03 | 4.73E+03 | + | Clade A | + | + | Clade A |
| 69 | C4 | 16±0.5     | 2.47E+03 | 8.72E+02 | 1.67E+03 | + | Clade A | + | + | Clade A |
| 70 | C4 | 11±0.5     | 4.51E+05 | 1.59E+05 | 3.05E+05 | + | Clade A | + | + | Clade A |

|    |    |            |          |          |          |   |         |   |   |         |
|----|----|------------|----------|----------|----------|---|---------|---|---|---------|
| 71 | C5 | N/A        | -        | -        | -        | - | N/A     | - | - | N/A     |
| 72 | C5 | 11.75±0.25 | 1.59E+05 | 9.45E+04 | 1.27E+05 | + | Clade A | + | + | Clade A |
| 73 | C5 | 9±0.5      | 3.62E+06 | 1.28E+06 | 2.45E+06 | + | Clade A | + | + | Clade A |
| 74 | C5 | 11.75±0.25 | 1.59E+05 | 9.45E+04 | 1.27E+05 | + | Clade A | + | + | Clade A |
| 75 | C5 | 12.5±0.5   | 9.45E+04 | 3.34E+04 | 6.39E+04 | + | Clade A | + | + | Clade A |
| 76 | D1 | N/A        | -        | -        | -        | - | N/A     | - | - | N/A     |
| 77 | D1 | N/A        | -        | -        | -        | - | N/A     | - | - | N/A     |
| 78 | D1 | N/A        | -        | -        | -        | - | N/A     | - | - | N/A     |
| 79 | D1 | N/A        | -        | -        | -        | - | N/A     | - | - | N/A     |
| 80 | D1 | N/A        | -        | -        | -        | - | N/A     | - | - | N/A     |
| 81 | D2 | 13.75±0.25 | 1.98E+04 | 1.18E+04 | 1.58E+04 | + | Clade A | + | + | Clade A |
| 82 | D2 | 12.75±0.25 | 5.62E+04 | 3.34E+04 | 4.48E+04 | + | Clade A | + | + | Clade A |
| 83 | D2 | 14.5±0.5   | 1.18E+04 | 4.16E+03 | 7.97E+03 | + | Clade A | + | + | Clade A |
| 84 | D2 | 13.75±0.25 | 1.18E+04 | 1.98E+04 | 1.58E+04 | + | Clade A | + | + | Clade A |
| 85 | D2 | 13.5±0.5   | 3.34E+04 | 1.18E+04 | 2.26E+04 | + | Clade A | + | + | Clade A |
| 86 | D3 | N/A        | -        | -        | -        | - | N/A     | - | - | N/A     |
| 87 | D3 | N/A        | -        | -        | -        | - | N/A     | - | - | N/A     |
| 88 | D3 | 12.25±0.25 | 5.62E+04 | 9.45E+04 | 7.53E+04 | + | Clade A | + | + | Clade A |
| 89 | D3 | 14±0.5     | 7.00E+03 | 1.98E+04 | 1.34E+04 | + | Clade A | + | + | Clade A |
| 90 | D3 | 12.25±0.25 | 5.62E+04 | 9.45E+04 | 7.53E+04 | + | Clade A | + | + | Clade A |
| 91 | D4 | 11.25±0.25 | 1.59E+05 | 2.68E+05 | 2.13E+05 | + | Clade A | + | + | Clade A |
| 92 | D4 | 13±0.5     | 5.62E+04 | 1.98E+04 | 3.80E+04 | + | Clade A | + | + | Clade A |
| 93 | D4 | 10.5±0.5   | 7.59E+05 | 2.68E+05 | 5.13E+05 | + | Clade A | + | + | Clade A |
| 94 | D4 | 10±0.5     | 1.28E+06 | 4.51E+05 | 8.64E+05 | + | Clade A | + | + | Clade A |
| 95 | D4 | 12±0.5     | 1.59E+05 | 5.62E+04 | 1.08E+05 | + | Clade A | + | + | Clade A |

|     |    |             |          |          |          |   |         |   |   |         |
|-----|----|-------------|----------|----------|----------|---|---------|---|---|---------|
| 96  | D5 | 11.5±0.5    | 2.68E+05 | 9.45E+04 | 1.81E+05 | + | Clade A | + | + | Clade A |
| 97  | D5 | 12.5±0.5    | 9.45E+04 | 3.34E+04 | 6.39E+04 | + | Clade A | + | + | Clade A |
| 98  | D5 | 14.5±0.5    | 1.18E+04 | 4.16E+03 | 7.97E+03 | + | Clade A | + | + | Clade A |
| 99  | D5 | 10.75±0.25  | 2.68E+05 | 4.51E+05 | 3.59E+05 | + | Clade A | + | + | Clade A |
| 100 | D5 | 12.5±0.5    | 9.45E+04 | 3.34E+04 | 6.39E+04 | + | Clade A | + | + | Clade A |
| 101 | E1 | 11.75±0.25  | 1.59E+05 | 9.45E+04 | 1.27E+05 | + | Clade B | + | + | Clade B |
| 102 | E1 | 10.5±0      | 4.51E+05 | 4.51E+05 | 4.51E+05 | + | Clade B | + | + | Clade B |
| 103 | E1 | 12.75±0.25  | 5.62E+04 | 3.34E+04 | 4.48E+04 | + | Clade B | + | + | Clade B |
| 104 | E1 | 10.35±0.35  | 7.59E+05 | 3.66E+05 | 5.62E+05 | + | Clade B | + | + | Clade B |
| 105 | E1 | 9.75±0.25   | 1.28E+06 | 7.59E+05 | 1.02E+06 | + | Clade B | + | + | Clade B |
| 106 | E2 | 14.75±0.25  | 7.00E+03 | 4.16E+03 | 5.58E+03 | + | Clade B | + | + | Clade B |
| 107 | E2 | 84.25±69.75 | 7.00E+03 | 5.64E-60 | 3.50E+03 | + | Clade B | + | + | Clade B |
| 108 | E2 | 12.25±0.25  | 5.62E+04 | 9.45E+04 | 7.53E+04 | + | Clade B | + | + | Clade B |
| 109 | E2 | 15.75±0.25  | 2.47E+03 | 1.47E+03 | 1.97E+03 | + | Clade B | + | + | Clade B |
| 110 | E2 | 14.25±0.25  | 7.00E+03 | 1.18E+04 | 9.39E+03 | + | Clade B | + | + | Clade B |
| 111 | E3 | 13.75±0.25  | 1.98E+04 | 1.18E+04 | 1.58E+04 | + | Clade B | + | + | Clade B |
| 112 | E3 | 10.25±0.25  | 4.51E+05 | 7.59E+05 | 6.05E+05 | + | Clade B | + | + | Clade B |
| 113 | E3 | 10±0        | 7.59E+05 | 7.59E+05 | 7.59E+05 | + | Clade B | + | + | Clade B |
| 114 | E3 | 9.25±0.25   | 2.15E+06 | 1.28E+06 | 1.71E+06 | + | Clade B | + | + | Clade B |
| 115 | E3 | 11±0.5      | 1.59E+05 | 4.51E+05 | 3.05E+05 | + | Clade B | + | + | Clade B |
| 116 | E4 | 12±0.5      | 1.59E+05 | 5.62E+04 | 1.08E+05 | + | Clade B | + | + | Clade B |
| 117 | E4 | 8.5±0       | 3.62E+06 | 3.62E+06 | 3.62E+06 | + | Clade B | + | + | Clade B |
| 118 | E4 | 7.75±0.25   | 1.03E+07 | 6.09E+06 | 8.17E+06 | + | Clade B | + | + | Clade B |
| 119 | E4 | 12.25±0.25  | 5.62E+04 | 9.45E+04 | 7.53E+04 | + | Clade B | + | + | Clade B |
| 120 | E4 | 10.25±0.25  | 4.51E+05 | 7.59E+05 | 6.05E+05 | + | Clade B | + | + | Clade B |

|     |    |            |          |          |          |   |         |   |   |         |
|-----|----|------------|----------|----------|----------|---|---------|---|---|---------|
| 121 | E5 | 12±0       | 9.45E+04 | 9.45E+04 | 9.45E+04 | + | Clade B | + | + | Clade B |
| 122 | E5 | 11±0       | 2.68E+05 | 2.68E+05 | 2.68E+05 | + | Clade B | + | + | Clade B |
| 123 | E5 | 10.5±0     | 4.51E+05 | 4.51E+05 | 4.51E+05 | + | Clade B | + | + | Clade B |
| 124 | E5 | 12.25±0.25 | 5.62E+04 | 9.45E+04 | 7.53E+04 | + | Clade B | + | + | Clade B |
| 125 | E5 | 12±0       | 9.45E+04 | 9.45E+04 | 9.45E+04 | + | Clade B | + | + | Clade B |
| 126 | F1 | 14.25±0.25 | 7.00E+03 | 1.18E+04 | 9.39E+03 | + | Clade A | + | + | Clade A |
| 127 | F1 | 8.75±0.25  | 2.15E+06 | 3.62E+06 | 2.88E+06 | + | Clade A | + | + | Clade A |
| 128 | F1 | 11.5±0     | 1.59E+05 | 1.59E+05 | 1.59E+05 | + | Clade A | + | + | Clade A |
| 129 | F1 | 12±0       | 9.45E+04 | 9.45E+04 | 9.45E+04 | + | Clade A | + | + | Clade A |
| 130 | F1 | 14.75±0.25 | 7.00E+03 | 4.16E+03 | 5.58E+03 | + | Clade A | + | + | Clade A |
| 131 | F2 | 9.5±0.5    | 2.15E+06 | 7.59E+05 | 1.45E+06 | + | Clade A | + | + | Clade A |
| 132 | F2 | 10.75±0.25 | 4.51E+05 | 2.68E+05 | 3.59E+05 | + | Clade A | + | + | Clade A |
| 133 | F2 | 9.25±0.25  | 1.28E+06 | 2.15E+06 | 1.71E+06 | + | Clade A | + | + | Clade A |
| 134 | F2 | 11.75±0.25 | 1.59E+05 | 9.45E+04 | 1.27E+05 | + | Clade A | + | + | Clade A |
| 135 | F2 | 12.25±0.25 | 5.62E+04 | 9.45E+04 | 7.53E+04 | + | Clade A | + | + | Clade A |
| 136 | F3 | 11±0       | 2.68E+05 | 2.68E+05 | 2.68E+05 | + | Clade A | + | + | Clade A |
| 137 | F3 | 12±0       | 9.45E+04 | 9.45E+04 | 9.45E+04 | + | Clade A | + | + | Clade A |
| 138 | F3 | 11.75±0.25 | 1.59E+05 | 9.45E+04 | 1.27E+05 | + | Clade A | + | + | Clade A |
| 139 | F3 | 9.5±0      | 1.28E+06 | 1.28E+06 | 1.28E+06 | + | Clade A | + | + | Clade A |
| 140 | F3 | 17.5±0     | 3.08E+02 | 3.08E+02 | 3.08E+02 | + | Clade A | + | + | Clade A |
| 141 | F4 | 13.75±0.25 | 1.18E+04 | 1.98E+04 | 1.58E+04 | + | Clade A | + | + | Clade A |
| 142 | F4 | 12.75±0.25 | 5.62E+04 | 3.34E+04 | 4.48E+04 | + | Clade A | + | + | Clade A |
| 143 | F4 | 11.25±0.25 | 1.59E+05 | 2.68E+05 | 2.13E+05 | + | Clade A | + | + | Clade A |
| 144 | F4 | 13±0.5     | 5.62E+04 | 1.98E+04 | 3.80E+04 | + | Clade A | + | + | Clade A |
| 145 | F4 | 10.5±0.5   | 7.59E+05 | 2.68E+05 | 5.13E+05 | + | Clade A | + | + | Clade A |

|     |    |            |          |          |          |   |         |   |   |         |
|-----|----|------------|----------|----------|----------|---|---------|---|---|---------|
| 146 | F5 | 10.5±0     | 4.51E+05 | 4.51E+05 | 4.51E+05 | + | Clade A | + | + | Clade A |
| 147 | F5 | 11.25±0.25 | 1.59E+05 | 2.68E+05 | 2.13E+05 | + | Clade A | + | + | Clade A |
| 148 | F5 | 11.75±0.25 | 1.59E+05 | 9.45E+04 | 1.27E+05 | + | Clade A | + | + | Clade A |
| 149 | F5 | 13±0       | 3.34E+04 | 3.34E+04 | 3.34E+04 | + | Clade A | + | + | Clade A |
| 150 | F5 | 14.25±0.25 | 1.18E+04 | 7.00E+03 | 9.39E+03 | + | Clade A | + | + | Clade A |

N/A, not determined.

+, positive result.

-, negative result.

a Filed location.

b Analysis of the sequencing of the LAMP products that amplified with primer sets F2-2/B2-2 or mF2-2/mB2-2.

c Growth on the PDA and YEPS<sub>L</sub>.

d Analysis of the sequencing of the PCR products that amplified with primers Pok317/Pok318<sup>31</sup>.

A, Qiliying town, Xinxiang County, Henan Province

B, Duliang town, Kaifeng City, Henan Province

C, Pohu town, Xuchang City, Henan Province

D, Wucheng town, Wuyang County, Henan Province

E, Baima town, Nanjing, Jiangsu Province

F, Zhengfu town, Fuyang City, Anhui Province



## Maize plants samples

| Samples NO. | Sample name <sup>a</sup> | Tt         | U. maydis (ng/μL) |           |           | LAMP products amplification | Sequencing analysis <sup>b</sup> | Growth on media <sup>c</sup> | PCR with Pok317/Pok318 | sequencing analysis <sup>d</sup> |
|-------------|--------------------------|------------|-------------------|-----------|-----------|-----------------------------|----------------------------------|------------------------------|------------------------|----------------------------------|
|             |                          |            | Test 1            | Test 2    | Average   |                             |                                  |                              |                        |                                  |
| 1           | A-1                      | 22±0       | 0.248995          | 0.248995  | 0.248995  | +                           | Clade A                          | +                            | +                      | Clade A                          |
| 2           | A-2                      | 18±0.5     | 1.3130764         | 1.0766139 | 1.1948451 | +                           | Clade A                          | +                            | +                      | Clade A                          |
| 3           | A-3                      | 18.5±0     | 1.0766139         | 1.0766139 | 1.0766139 | +                           | Clade A                          | +                            | +                      | Clade A                          |
| 4           | A-4                      | 22.5±0.5   | 0.248995          | 0.0125325 | 0.1307638 | +                           | Clade A                          | +                            | +                      | Clade A                          |
| 5           | A-5                      | 20±0.5     | 0.8401513         | 0.6036888 | 0.7219201 | +                           | Clade A                          | +                            | +                      | Clade A                          |
| 6           | A-6                      | 22.75±0.25 | 0.1307638         | 0.0125325 | 0.0716481 | +                           | Clade A                          | +                            | +                      | Clade A                          |
| 7           | A-7                      | 22.5±0.5   | 0.0125325         | 0.248995  | 0.1307638 | +                           | Clade A                          | +                            | +                      | Clade A                          |
| 8           | A-8                      | 17.25±0.25 | 1.3130764         | 1.4313076 | 1.372192  | +                           | Clade A                          | +                            | +                      | Clade A                          |
| 9           | A-9                      | 22.5±0.5   | 0.0125325         | 0.248995  | 0.1307638 | +                           | Clade A                          | +                            | +                      | Clade A                          |
| 10          | B1-1                     | 22±0.5     | 0.1307638         | 0.3672263 | 0.248995  | +                           | Clade A                          | +                            | +                      | Clade A                          |
| 11          | B1-2                     | 21±0.5     | 0.6036888         | 0.3672263 | 0.4854576 | +                           | Clade A                          | +                            | +                      | Clade A                          |
| 12          | B1-3                     | 22.75±0.25 | 0.0125325         | 0.1307638 | 0.0716481 | +                           | Clade A                          | +                            | +                      | Clade A                          |
| 13          | B1-4                     | 17±0       | 1.4313076         | 1.4313076 | 1.4313076 | +                           | Clade A                          | +                            | +                      | Clade A                          |
| 14          | B1-5                     | 15.5±0.5   | 1.9042327         | 1.6677702 | 1.7860014 | +                           | Clade A                          | +                            | +                      | Clade A                          |
| 15          | B1-6                     | 11.75±0.25 | 2.7318515         | 2.6136202 | 2.6727359 | +                           | Clade A                          | +                            | +                      | Clade A                          |
| 16          | B1-7                     | 13.25±0.25 | 2.3771577         | 2.2589265 | 2.3180421 | +                           | Clade A                          | +                            | +                      | Clade A                          |
| 17          | B1-8                     | 19±0       | 0.9583826         | 0.9583826 | 0.9583826 | +                           | Clade A                          | +                            | +                      | Clade A                          |
| 18          | B1-9                     | 18.25±0.25 | 1.1948451         | 1.0766139 | 1.1357295 | +                           | Clade A                          | +                            | +                      | Clade A                          |
| 19          | B2-1                     | 18.75±0.25 | 0.9583826         | 1.0766139 | 1.0174982 | +                           | Clade A                          | +                            | +                      | Clade A                          |
| 20          | B2-2                     | 16.75±0.25 | 1.5495389         | 1.4313076 | 1.4904233 | +                           | Clade A                          | +                            | +                      | Clade A                          |

|    |      |            |           |           |           |   |         |   |   |         |
|----|------|------------|-----------|-----------|-----------|---|---------|---|---|---------|
| 21 | B2-3 | 17±0.5     | 1.3130764 | 1.5495389 | 1.4313076 | + | Clade A | + | + | Clade A |
| 22 | B2-4 | 13.75±0.25 | 2.2589265 | 2.1406952 | 2.1998108 | + | Clade A | + | + | Clade A |
| 23 | B2-5 | 18±0.5     | 1.0766139 | 1.3130764 | 1.1948451 | + | Clade A | + | + | Clade A |
| 24 | B2-6 | 15.25±0.25 | 1.7860014 | 1.9042327 | 1.845117  | + | Clade A | + | + | Clade A |
| 25 | B2-7 | 18.5±0     | 1.0766139 | 1.0766139 | 1.0766139 | + | Clade A | + | + | Clade A |
| 26 | B2-8 | 13.25±0.25 | 2.2589265 | 2.3771577 | 2.3180421 | + | Clade A | + | + | Clade A |
| 27 | B2-9 | 20.25±0.25 | 0.6036888 | 0.7219201 | 0.6628044 | + | Clade A | + | + | Clade A |
| 28 | C-1  | 22.25±0.25 | 0.248995  | 0.1307638 | 0.1898794 | + | Clade A | + | + | Clade A |
| 29 | C-2  | 21.5±0.5   | 0.248995  | 0.4854576 | 0.3672263 | + | Clade A | + | + | Clade A |
| 30 | C-3  | 22.75±0.25 | 0.0125325 | 0.1307638 | 0.0716481 | + | Clade A | + | + | Clade A |
| 31 | C-4  | 23±0       | 0.0125325 | 0.0125325 | 0.0125325 | + | Clade A | + | + | Clade A |
| 32 | C-5  | 22.5±0.5   | 0.248995  | 0.0125325 | 0.1307638 | + | Clade A | + | + | Clade A |
| 33 | C-6  | 16.25±0.25 | 1.6677702 | 1.5495389 | 1.6086545 | + | Clade A | + | + | Clade A |
| 34 | C-7  | 18.5±0.5   | 1.1948451 | 0.9583826 | 1.0766139 | + | Clade A | + | + | Clade A |
| 35 | C-8  | 20.25±0.25 | 0.7219201 | 0.6036888 | 0.6628044 | + | Clade A | + | + | Clade A |
| 36 | C-9  | 16.25±0.25 | 1.5495389 | 1.6677702 | 1.6086545 | + | Clade A | + | + | Clade A |
| 37 | D-1  | 20.5±0     | 0.6036888 | 0.6036888 | 0.6036888 | + | Clade A | + | + | Clade A |
| 38 | D-2  | 22±0.5     | 0.1307638 | 0.3672263 | 0.248995  | + | Clade A | + | + | Clade A |
| 39 | D-3  | 22.75±0.25 | 0.1307638 | 0.0125325 | 0.0716481 | + | Clade A | + | + | Clade A |
| 40 | D-4  | 20.5±0.5   | 0.7219201 | 0.4854576 | 0.6036888 | + | Clade A | + | + | Clade A |
| 41 | D-5  | 21±0.5     | 0.3672263 | 0.6036888 | 0.4854576 | + | Clade A | + | + | Clade A |
| 42 | D-6  | 14.5±0.5   | 2.1406952 | 1.9042327 | 2.0224639 | + | Clade A | + | + | Clade A |
| 43 | D-7  | 14.25±0.25 | 2.1406952 | 2.0224639 | 2.0815796 | + | Clade A | + | + | Clade A |
| 44 | D-8  | 14±0.5     | 2.2589265 | 2.0224639 | 2.1406952 | + | Clade A | + | + | Clade A |
| 45 | D-9  | 19.5±0     | 0.8401513 | 0.8401513 | 0.8401513 | + | Clade A | + | + | Clade A |

|    |     |            |           |           |           |   |         |   |   |         |
|----|-----|------------|-----------|-----------|-----------|---|---------|---|---|---------|
| 46 | M-1 | N/A        | -         | -         | -         | - | N/A     | - | - | N/A     |
| 47 | M-2 | N/A        | -         | -         | -         | - | N/A     | - | - | N/A     |
| 48 | M-3 | 20.25±0.25 | 0.7219201 | 0.6036888 | 0.6628044 | + | Clade A | + | + | Clade A |
| 49 | M-4 | 18.5±0     | 1.0766139 | 1.0766139 | 1.0766139 | + | Clade A | + | + | Clade A |
| 50 | M-5 | 22.5±0.5   | 0.0125325 | 0.248995  | 0.1307638 | + | Clade A | + | + | Clade A |
| 51 | M-6 | 20.75±0.25 | 0.6036888 | 0.4854576 | 0.5445732 | + | Clade A | + | + | Clade A |
| 52 | M-7 | 16.25±0.25 | 1.5495389 | 1.6677702 | 1.6086545 | + | Clade A | + | + | Clade A |
| 53 | M-8 | 15.5±0     | 1.7860014 | 1.7860014 | 1.7860014 | + | Clade A | + | + | Clade A |
| 54 | M-9 | 15±0.5     | 2.0224639 | 1.7860014 | 1.9042327 | + | Clade A | + | + | Clade A |
| 55 | S-1 | N/A        | -         | -         | -         | - | N/A     | - | - | N/A     |
| 56 | S-2 | N/A        | -         | -         | -         | - | N/A     | - | - | N/A     |
| 57 | S-3 | N/A        | -         | -         | -         | - | N/A     | - | - | N/A     |
| 58 | S-4 | N/A        | -         | -         | -         | - | N/A     | - | - | N/A     |
| 59 | S-5 | N/A        | -         | -         | -         | - | N/A     | - | - | N/A     |
| 60 | S-6 | N/A        | -         | -         | -         | - | N/A     | - | - | N/A     |
| 61 | S-7 | N/A        | -         | -         | -         | - | N/A     | - | - | N/A     |
| 62 | S-8 | N/A        | -         | -         | -         | - | N/A     | - | - | N/A     |
| 63 | S-9 | N/A        | -         | -         | -         | - | N/A     | - | - | N/A     |
| 64 | Z-1 | 22.25±0.25 | 0.1307638 | 0.248995  | 0.1898794 | + | Clade A | + | + | Clade A |
| 65 | Z-2 | 17.75±0.25 | 1.3130764 | 1.1948451 | 1.2539607 | + | Clade A | + | + | Clade A |
| 66 | Z-3 | 19.25±0.25 | 0.8401513 | 0.9583826 | 0.899267  | + | Clade A | + | + | Clade A |
| 67 | Z-4 | 18.75±0.25 | 1.0766139 | 0.9583826 | 1.0174982 | + | Clade A | + | + | Clade A |
| 68 | Z-5 | 20.75±0.25 | 0.6036888 | 0.4854576 | 0.5445732 | + | Clade A | + | + | Clade A |
| 69 | Z-6 | 18±0       | 1.1948451 | 1.1948451 | 1.1948451 | + | Clade A | + | + | Clade A |
| 70 | Z-7 | 16.5±0.5   | 1.4313076 | 1.6677702 | 1.5495389 | + | Clade A | + | + | Clade A |

|    |     |            |           |           |           |   |         |   |   |         |
|----|-----|------------|-----------|-----------|-----------|---|---------|---|---|---------|
| 71 | Z-8 | 15±0.5     | 2.0224639 | 1.7860014 | 1.9042327 | + | Clade A | + | + | Clade A |
| 72 | Z-9 | 21.25±0.25 | 0.3672263 | 0.4854576 | 0.4263419 | + | Clade A | + | + | Clade A |

N/A, not determined.

+, positive result.

-, negative result.

a Genotypes of maize plants samples.

b Analysis of the sequencing of the LAMP products that amplified with primer sets F2-2/B2-2 or mF2-2/mB2-2.

c Growth on the PDA and YEPS<sub>L</sub>.

d Analysis of the sequencing of the PCR products that amplified with primers Pok317/Pok318<sup>31</sup>.

A, A801.

B1, B73.

B2, B104.

C, Chang7-2.

D, Dan340.

M, Mo17.

S, Shen137.

Z, Zheng58.
